# Supplementary material for: Soil-MobiNet: A Convolutional Neural Network Model Base Soil Classification to Determine Soil Morphology and Its Geospatial Location
Source: MDPI journal article supplement (doi:10.3390/s23156709), 2023-07-27

```
In [17]: import numpy as np
from tqdm import tqdm
import os
import cv2
import shutil
import random
import time
import matplotlib.pyplot as plt
%matplotlib inline
import tensorflow as tf
from tensorflow import keras
from keras import backend as K
from tensorflow.keras.layers import Dense, Dropout, Activation, Flatten, SpatialDropout
from tensorflow.keras.optimizers import Adam
from tensorflow.keras.metrics import categorical_crossentropy
from tensorflow.keras.preprocessing.image import ImageDataGenerator
from tensorflow.keras.preprocessing import image
from tensorflow.keras.models import Model
from tensorflow.keras.applications import imagenet_utils
from tensorflow.keras.applications import MobileNet
from tensorflow.keras.applications.mobilenet import preprocess_input
from IPython.display import Image
from sklearn.metrics import confusion_matrix
import itertools
import datetime
import time
```

```
In [18]: mobile = tf.keras.applications.mobilenet.MobileNet()
```

```
In [19]: mobile.summary()
```

Model: "mobilenet\_1.00\_224"

| Layer (type)                      | Output Shape          | Param # |
|-----------------------------------|-----------------------|---------|
| input_1 (InputLayer)              | [(None, 224, 224, 3)] | 0       |
| conv1 (Conv2D)                    | (None, 112, 112, 32)  | 864     |
| conv1_bn (BatchNormalization)     | (None, 112, 112, 32)  | 128     |
| conv1_relu (ReLU)                 | (None, 112, 112, 32)  | 0       |
| conv_dw_1 (DepthwiseConv2D)       | (None, 112, 112, 32)  | 288     |
| conv_dw_1_bn (BatchNormalization) | (None, 112, 112, 32)  | 128     |
| conv_dw_1_relu (ReLU)             | (None, 112, 112, 32)  | 0       |
| conv_pw_1 (Conv2D)                | (None, 112, 112, 64)  | 2048    |
| conv_pw_1_bn (BatchNormalization) | (None, 112, 112, 64)  | 256     |
| conv_pw_1_relu (ReLU)             | (None, 112, 112, 64)  | 0       |
| conv_pad_2 (ZeroPadding2D)        | (None, 113, 113, 64)  | 0       |
| conv_dw_2 (DepthwiseConv2D)       | (None, 56, 56, 64)    | 576     |
| conv_dw_2_bn (BatchNormalization) | (None, 56, 56, 64)    | 256     |
| conv_dw_2_relu (ReLU)             | (None, 56, 56, 64)    | 0       |
| conv_pw_2 (Conv2D)                | (None, 56, 56, 128)   | 8192    |
| conv_pw_2_bn (BatchNormalization) | (None, 56, 56, 128)   | 512     |
| conv_pw_2_relu (ReLU)             | (None, 56, 56, 128)   | 0       |
| conv_dw_3 (DepthwiseConv2D)       | (None, 56, 56, 128)   | 1152    |
| conv_dw_3_bn (BatchNormalization) | (None, 56, 56, 128)   | 512     |
| conv_dw_3_relu (ReLU)             | (None, 56, 56, 128)   | 0       |
| conv_pw_3 (Conv2D)                | (None, 56, 56, 128)   | 16384   |
| conv_pw_3_bn (BatchNormalization) | (None, 56, 56, 128)   | 512     |
| conv_pw_3_relu (ReLU)             | (None, 56, 56, 128)   | 0       |
| conv_pad_4 (ZeroPadding2D)        | (None, 57, 57, 128)   | 0       |
| conv_dw_4 (DepthwiseConv2D)       | (None, 28, 28, 128)   | 1152    |

|                                       |                     |        |
|---------------------------------------|---------------------|--------|
| conv_dw_4_bn (BatchNormaliz<br>ation) | (None, 28, 28, 128) | 512    |
| conv_dw_4_relu (ReLU)                 | (None, 28, 28, 128) | 0      |
| conv_pw_4 (Conv2D)                    | (None, 28, 28, 256) | 32768  |
| conv_pw_4_bn (BatchNormaliz<br>ation) | (None, 28, 28, 256) | 1024   |
| conv_pw_4_relu (ReLU)                 | (None, 28, 28, 256) | 0      |
| conv_dw_5 (DepthwiseConv2D)           | (None, 28, 28, 256) | 2304   |
| conv_dw_5_bn (BatchNormaliz<br>ation) | (None, 28, 28, 256) | 1024   |
| conv_dw_5_relu (ReLU)                 | (None, 28, 28, 256) | 0      |
| conv_pw_5 (Conv2D)                    | (None, 28, 28, 256) | 65536  |
| conv_pw_5_bn (BatchNormaliz<br>ation) | (None, 28, 28, 256) | 1024   |
| conv_pw_5_relu (ReLU)                 | (None, 28, 28, 256) | 0      |
| conv_pad_6 (ZeroPadding2D)            | (None, 29, 29, 256) | 0      |
| conv_dw_6 (DepthwiseConv2D)           | (None, 14, 14, 256) | 2304   |
| conv_dw_6_bn (BatchNormaliz<br>ation) | (None, 14, 14, 256) | 1024   |
| conv_dw_6_relu (ReLU)                 | (None, 14, 14, 256) | 0      |
| conv_pw_6 (Conv2D)                    | (None, 14, 14, 512) | 131072 |
| conv_pw_6_bn (BatchNormaliz<br>ation) | (None, 14, 14, 512) | 2048   |
| conv_pw_6_relu (ReLU)                 | (None, 14, 14, 512) | 0      |
| conv_dw_7 (DepthwiseConv2D)           | (None, 14, 14, 512) | 4608   |
| conv_dw_7_bn (BatchNormaliz<br>ation) | (None, 14, 14, 512) | 2048   |
| conv_dw_7_relu (ReLU)                 | (None, 14, 14, 512) | 0      |
| conv_pw_7 (Conv2D)                    | (None, 14, 14, 512) | 262144 |
| conv_pw_7_bn (BatchNormaliz<br>ation) | (None, 14, 14, 512) | 2048   |
| conv_pw_7_relu (ReLU)                 | (None, 14, 14, 512) | 0      |
| conv_dw_8 (DepthwiseConv2D)           | (None, 14, 14, 512) | 4608   |
| conv_dw_8_bn (BatchNormaliz           | (None, 14, 14, 512) | 2048   |

|                                        |                     |        |
|----------------------------------------|---------------------|--------|
| ation)                                 |                     |        |
| conv_dw_8_relu (ReLU)                  | (None, 14, 14, 512) | 0      |
| conv_pw_8 (Conv2D)                     | (None, 14, 14, 512) | 262144 |
| conv_pw_8_bn (BatchNormaliz<br>ation)  | (None, 14, 14, 512) | 2048   |
| conv_pw_8_relu (ReLU)                  | (None, 14, 14, 512) | 0      |
| conv_dw_9 (DepthwiseConv2D)            | (None, 14, 14, 512) | 4608   |
| conv_dw_9_bn (BatchNormaliz<br>ation)  | (None, 14, 14, 512) | 2048   |
| conv_dw_9_relu (ReLU)                  | (None, 14, 14, 512) | 0      |
| conv_pw_9 (Conv2D)                     | (None, 14, 14, 512) | 262144 |
| conv_pw_9_bn (BatchNormaliz<br>ation)  | (None, 14, 14, 512) | 2048   |
| conv_pw_9_relu (ReLU)                  | (None, 14, 14, 512) | 0      |
| conv_dw_10 (DepthwiseConv2D<br>)       | (None, 14, 14, 512) | 4608   |
| conv_dw_10_bn (BatchNormali<br>zation) | (None, 14, 14, 512) | 2048   |
| conv_dw_10_relu (ReLU)                 | (None, 14, 14, 512) | 0      |
| conv_pw_10 (Conv2D)                    | (None, 14, 14, 512) | 262144 |
| conv_pw_10_bn (BatchNormali<br>zation) | (None, 14, 14, 512) | 2048   |
| conv_pw_10_relu (ReLU)                 | (None, 14, 14, 512) | 0      |
| conv_dw_11 (DepthwiseConv2D<br>)       | (None, 14, 14, 512) | 4608   |
| conv_dw_11_bn (BatchNormali<br>zation) | (None, 14, 14, 512) | 2048   |
| conv_dw_11_relu (ReLU)                 | (None, 14, 14, 512) | 0      |
| conv_pw_11 (Conv2D)                    | (None, 14, 14, 512) | 262144 |
| conv_pw_11_bn (BatchNormali<br>zation) | (None, 14, 14, 512) | 2048   |
| conv_pw_11_relu (ReLU)                 | (None, 14, 14, 512) | 0      |
| conv_pad_12 (ZeroPadding2D)            | (None, 15, 15, 512) | 0      |
| conv_dw_12 (DepthwiseConv2D<br>)       | (None, 7, 7, 512)   | 4608   |

|                                                       |                    |         |
|-------------------------------------------------------|--------------------|---------|
| conv_dw_12_bn (BatchNormali<br>zation)                | (None, 7, 7, 512)  | 2048    |
| conv_dw_12_relu (ReLU)                                | (None, 7, 7, 512)  | 0       |
| conv_pw_12 (Conv2D)                                   | (None, 7, 7, 1024) | 524288  |
| conv_pw_12_bn (BatchNormali<br>zation)                | (None, 7, 7, 1024) | 4096    |
| conv_pw_12_relu (ReLU)                                | (None, 7, 7, 1024) | 0       |
| conv_dw_13 (DepthwiseConv2D<br>)                      | (None, 7, 7, 1024) | 9216    |
| conv_dw_13_bn (BatchNormali<br>zation)                | (None, 7, 7, 1024) | 4096    |
| conv_dw_13_relu (ReLU)                                | (None, 7, 7, 1024) | 0       |
| conv_pw_13 (Conv2D)                                   | (None, 7, 7, 1024) | 1048576 |
| conv_pw_13_bn (BatchNormali<br>zation)                | (None, 7, 7, 1024) | 4096    |
| conv_pw_13_relu (ReLU)                                | (None, 7, 7, 1024) | 0       |
| global_average_pooling2d (G<br>lobalAveragePooling2D) | (None, 1, 1, 1024) | 0       |
| dropout (Dropout)                                     | (None, 1, 1, 1024) | 0       |
| conv_preds (Conv2D)                                   | (None, 1, 1, 1000) | 1025000 |
| reshape_2 (Reshape)                                   | (None, 1000)       | 0       |
| predictions (Activation)                              | (None, 1000)       | 0       |

```
=====
Total params: 4,253,864
Trainable params: 4,231,976
Non-trainable params: 21,888
```

```
In [20]: def prepare_image(file):
img_path = ''
img = image.load_img(img_path + file, target_size=(224, 224))
img_array = image.img_to_array(img)
img_array_expanded_dims = np.expand_dims(img_array, axis=0)
return tf.keras.applications.mobilenet.preprocess_input(img_array_expanded_dims)
```

```
In [21]: num_of_train_samples = 26508
num_of_valid_samples = 11361
num_of_test_samples = 360
```

```
In [22]: #Show sample image
Image(filename='C:/Users/GyasiEmmanuelKwabena/Desktop/SOILNET/train/RE/RE_372.png', wi
```

Out[22]:

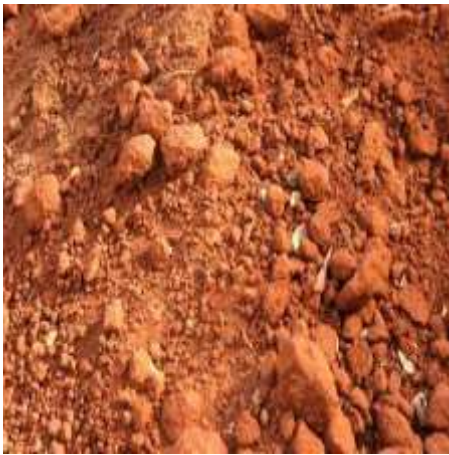

```
In [23]: train_path = 'C:/Users/GyasiEmmanuelKwabena/Desktop/SOILNET/train'
valid_path = 'C:/Users/GyasiEmmanuelKwabena/Desktop/SOILNET/valid'
test_path = 'C:/Users/GyasiEmmanuelKwabena/Desktop/SOILNET/test'

train_batches = ImageDataGenerator(preprocessing_function=tf.keras.applications.mobilenet_v2.preprocess_input,
                                   directory=train_path, target_size=(224,224), batch_size=22)
valid_batches = ImageDataGenerator(preprocessing_function=tf.keras.applications.mobilenet_v2.preprocess_input,
                                   directory=valid_path, target_size=(224,224), batch_size=22)
test_batches = ImageDataGenerator(preprocessing_function=tf.keras.applications.mobilenet_v2.preprocess_input,
                                   directory=test_path, target_size=(224,224), batch_size=360, shuffle=False)

batchX, batchy = train_batches.next()
print('Batch shape=%s, min=%.3f, max=%.3f' % (batchX.shape, batchX.min(), batchX.max()))

Found 26508 images belonging to 9 classes.
Found 11361 images belonging to 9 classes.
Found 360 images belonging to 9 classes.
Batch shape=(22, 224, 224, 3), min=-1.000, max=1.000
```

```
In [24]: # Modify the model: Mobilenet

base_model=MobileNet(weights='imagenet',include_top=False) #imports the mobilenet model and sets it to be
non-trainable

x=base_model.output
x=GlobalAveragePooling2D()(x)
x=Dense(300,activation='relu')(x) # 300 we add dense layers so that the model can learn
x=Dense(200,activation='relu')(x) # 200 dense layer 2
x=Dense(512,activation='relu')(x) # 512 dense layer 3
preds=Dense(9,activation='softmax')(x) #final layer with softmax activation

WARNING:tensorflow:`input_shape` is undefined or non-square, or `rows` is not in [128, 160, 192, 224]. Weights for input shape (224, 224) will be loaded as the default.
```

```
In [25]: for i,layer in enumerate(base_model.layers):
          print(i,layer.name)
```

```
0 input_2
1 conv1
2 conv1_bn
3 conv1_relu
4 conv_dw_1
5 conv_dw_1_bn
6 conv_dw_1_relu
7 conv_pw_1
8 conv_pw_1_bn
9 conv_pw_1_relu
10 conv_pad_2
11 conv_dw_2
12 conv_dw_2_bn
13 conv_dw_2_relu
14 conv_pw_2
15 conv_pw_2_bn
16 conv_pw_2_relu
17 conv_dw_3
18 conv_dw_3_bn
19 conv_dw_3_relu
20 conv_pw_3
21 conv_pw_3_bn
22 conv_pw_3_relu
23 conv_pad_4
24 conv_dw_4
25 conv_dw_4_bn
26 conv_dw_4_relu
27 conv_pw_4
28 conv_pw_4_bn
29 conv_pw_4_relu
30 conv_dw_5
31 conv_dw_5_bn
32 conv_dw_5_relu
33 conv_pw_5
34 conv_pw_5_bn
35 conv_pw_5_relu
36 conv_pad_6
37 conv_dw_6
38 conv_dw_6_bn
39 conv_dw_6_relu
40 conv_pw_6
41 conv_pw_6_bn
42 conv_pw_6_relu
43 conv_dw_7
44 conv_dw_7_bn
45 conv_dw_7_relu
46 conv_pw_7
47 conv_pw_7_bn
48 conv_pw_7_relu
49 conv_dw_8
50 conv_dw_8_bn
51 conv_dw_8_relu
52 conv_pw_8
53 conv_pw_8_bn
54 conv_pw_8_relu
55 conv_dw_9
56 conv_dw_9_bn
57 conv_dw_9_relu
58 conv_pw_9
59 conv_pw_9_bn
```

```
60 conv_pw_9_relu
61 conv_dw_10
62 conv_dw_10_bn
63 conv_dw_10_relu
64 conv_pw_10
65 conv_pw_10_bn
66 conv_pw_10_relu
67 conv_dw_11
68 conv_dw_11_bn
69 conv_dw_11_relu
70 conv_pw_11
71 conv_pw_11_bn
72 conv_pw_11_relu
73 conv_pad_12
74 conv_dw_12
75 conv_dw_12_bn
76 conv_dw_12_relu
77 conv_pw_12
78 conv_pw_12_bn
79 conv_pw_12_relu
80 conv_dw_13
81 conv_dw_13_bn
82 conv_dw_13_relu
83 conv_pw_13
84 conv_pw_13_bn
85 conv_pw_13_relu
```

```
In [26]: #we want to set the first 20 layers of the network to be non-trainable
        for layer in base_model.layers[:20]:
            layer.trainable=False
```

```
In [27]: model=Model(inputs=base_model.input,outputs=preds)
```

```
In [28]: model.summary()
```

Model: "model"

| Layer (type)                      | Output Shape            | Param # |
|-----------------------------------|-------------------------|---------|
| input_2 (InputLayer)              | [(None, None, None, 3)] | 0       |
| conv1 (Conv2D)                    | (None, None, None, 32)  | 864     |
| conv1_bn (BatchNormalization)     | (None, None, None, 32)  | 128     |
| conv1_relu (ReLU)                 | (None, None, None, 32)  | 0       |
| conv_dw_1 (DepthwiseConv2D)       | (None, None, None, 32)  | 288     |
| conv_dw_1_bn (BatchNormalization) | (None, None, None, 32)  | 128     |
| conv_dw_1_relu (ReLU)             | (None, None, None, 32)  | 0       |
| conv_pw_1 (Conv2D)                | (None, None, None, 64)  | 2048    |
| conv_pw_1_bn (BatchNormalization) | (None, None, None, 64)  | 256     |
| conv_pw_1_relu (ReLU)             | (None, None, None, 64)  | 0       |
| conv_pad_2 (ZeroPadding2D)        | (None, None, None, 64)  | 0       |
| conv_dw_2 (DepthwiseConv2D)       | (None, None, None, 64)  | 576     |
| conv_dw_2_bn (BatchNormalization) | (None, None, None, 64)  | 256     |
| conv_dw_2_relu (ReLU)             | (None, None, None, 64)  | 0       |
| conv_pw_2 (Conv2D)                | (None, None, None, 128) | 8192    |
| conv_pw_2_bn (BatchNormalization) | (None, None, None, 128) | 512     |
| conv_pw_2_relu (ReLU)             | (None, None, None, 128) | 0       |
| conv_dw_3 (DepthwiseConv2D)       | (None, None, None, 128) | 1152    |
| conv_dw_3_bn (BatchNormalization) | (None, None, None, 128) | 512     |
| conv_dw_3_relu (ReLU)             | (None, None, None, 128) | 0       |
| conv_pw_3 (Conv2D)                | (None, None, None, 128) | 16384   |
| conv_pw_3_bn (BatchNormalization) | (None, None, None, 128) | 512     |
| conv_pw_3_relu (ReLU)             | (None, None, None, 128) | 0       |
| conv_pad_4 (ZeroPadding2D)        | (None, None, None, 128) | 0       |
| conv_dw_4 (DepthwiseConv2D)       | (None, None, None, 128) | 1152    |

|                                       |                         |        |
|---------------------------------------|-------------------------|--------|
| conv_dw_4_bn (BatchNormaliz<br>ation) | (None, None, None, 128) | 512    |
| conv_dw_4_relu (ReLU)                 | (None, None, None, 128) | 0      |
| conv_pw_4 (Conv2D)                    | (None, None, None, 256) | 32768  |
| conv_pw_4_bn (BatchNormaliz<br>ation) | (None, None, None, 256) | 1024   |
| conv_pw_4_relu (ReLU)                 | (None, None, None, 256) | 0      |
| conv_dw_5 (DepthwiseConv2D)           | (None, None, None, 256) | 2304   |
| conv_dw_5_bn (BatchNormaliz<br>ation) | (None, None, None, 256) | 1024   |
| conv_dw_5_relu (ReLU)                 | (None, None, None, 256) | 0      |
| conv_pw_5 (Conv2D)                    | (None, None, None, 256) | 65536  |
| conv_pw_5_bn (BatchNormaliz<br>ation) | (None, None, None, 256) | 1024   |
| conv_pw_5_relu (ReLU)                 | (None, None, None, 256) | 0      |
| conv_pad_6 (ZeroPadding2D)            | (None, None, None, 256) | 0      |
| conv_dw_6 (DepthwiseConv2D)           | (None, None, None, 256) | 2304   |
| conv_dw_6_bn (BatchNormaliz<br>ation) | (None, None, None, 256) | 1024   |
| conv_dw_6_relu (ReLU)                 | (None, None, None, 256) | 0      |
| conv_pw_6 (Conv2D)                    | (None, None, None, 512) | 131072 |
| conv_pw_6_bn (BatchNormaliz<br>ation) | (None, None, None, 512) | 2048   |
| conv_pw_6_relu (ReLU)                 | (None, None, None, 512) | 0      |
| conv_dw_7 (DepthwiseConv2D)           | (None, None, None, 512) | 4608   |
| conv_dw_7_bn (BatchNormaliz<br>ation) | (None, None, None, 512) | 2048   |
| conv_dw_7_relu (ReLU)                 | (None, None, None, 512) | 0      |
| conv_pw_7 (Conv2D)                    | (None, None, None, 512) | 262144 |
| conv_pw_7_bn (BatchNormaliz<br>ation) | (None, None, None, 512) | 2048   |
| conv_pw_7_relu (ReLU)                 | (None, None, None, 512) | 0      |
| conv_dw_8 (DepthwiseConv2D)           | (None, None, None, 512) | 4608   |
| conv_dw_8_bn (BatchNormaliz           | (None, None, None, 512) | 2048   |

ation)

|                                        |                         |        |
|----------------------------------------|-------------------------|--------|
| conv_dw_8_relu (ReLU)                  | (None, None, None, 512) | 0      |
| conv_pw_8 (Conv2D)                     | (None, None, None, 512) | 262144 |
| conv_pw_8_bn (BatchNormaliz<br>ation)  | (None, None, None, 512) | 2048   |
| conv_pw_8_relu (ReLU)                  | (None, None, None, 512) | 0      |
| conv_dw_9 (DepthwiseConv2D)            | (None, None, None, 512) | 4608   |
| conv_dw_9_bn (BatchNormaliz<br>ation)  | (None, None, None, 512) | 2048   |
| conv_dw_9_relu (ReLU)                  | (None, None, None, 512) | 0      |
| conv_pw_9 (Conv2D)                     | (None, None, None, 512) | 262144 |
| conv_pw_9_bn (BatchNormaliz<br>ation)  | (None, None, None, 512) | 2048   |
| conv_pw_9_relu (ReLU)                  | (None, None, None, 512) | 0      |
| conv_dw_10 (DepthwiseConv2D<br>)       | (None, None, None, 512) | 4608   |
| conv_dw_10_bn (BatchNormali<br>zation) | (None, None, None, 512) | 2048   |
| conv_dw_10_relu (ReLU)                 | (None, None, None, 512) | 0      |
| conv_pw_10 (Conv2D)                    | (None, None, None, 512) | 262144 |
| conv_pw_10_bn (BatchNormali<br>zation) | (None, None, None, 512) | 2048   |
| conv_pw_10_relu (ReLU)                 | (None, None, None, 512) | 0      |
| conv_dw_11 (DepthwiseConv2D<br>)       | (None, None, None, 512) | 4608   |
| conv_dw_11_bn (BatchNormali<br>zation) | (None, None, None, 512) | 2048   |
| conv_dw_11_relu (ReLU)                 | (None, None, None, 512) | 0      |
| conv_pw_11 (Conv2D)                    | (None, None, None, 512) | 262144 |
| conv_pw_11_bn (BatchNormali<br>zation) | (None, None, None, 512) | 2048   |
| conv_pw_11_relu (ReLU)                 | (None, None, None, 512) | 0      |
| conv_pad_12 (ZeroPadding2D)            | (None, None, None, 512) | 0      |
| conv_dw_12 (DepthwiseConv2D<br>)       | (None, None, None, 512) | 4608   |

|                                                        |                          |         |
|--------------------------------------------------------|--------------------------|---------|
| conv_dw_12_bn (BatchNormali<br>zation)                 | (None, None, None, 512)  | 2048    |
| conv_dw_12_relu (ReLU)                                 | (None, None, None, 512)  | 0       |
| conv_pw_12 (Conv2D)                                    | (None, None, None, 1024) | 524288  |
| conv_pw_12_bn (BatchNormali<br>zation)                 | (None, None, None, 1024) | 4096    |
| conv_pw_12_relu (ReLU)                                 | (None, None, None, 1024) | 0       |
| conv_dw_13 (DepthwiseConv2D<br>)                       | (None, None, None, 1024) | 9216    |
| conv_dw_13_bn (BatchNormali<br>zation)                 | (None, None, None, 1024) | 4096    |
| conv_dw_13_relu (ReLU)                                 | (None, None, None, 1024) | 0       |
| conv_pw_13 (Conv2D)                                    | (None, None, None, 1024) | 1048576 |
| conv_pw_13_bn (BatchNormali<br>zation)                 | (None, None, None, 1024) | 4096    |
| conv_pw_13_relu (ReLU)                                 | (None, None, None, 1024) | 0       |
| global_average_pooling2d_1<br>(GlobalAveragePooling2D) | (None, 1024)             | 0       |
| dense (Dense)                                          | (None, 300)              | 307500  |
| dense_1 (Dense)                                        | (None, 200)              | 60200   |
| dense_2 (Dense)                                        | (None, 512)              | 102912  |
| dense_3 (Dense)                                        | (None, 9)                | 4617    |

```
=====
Total params: 3,704,093
Trainable params: 3,668,189
Non-trainable params: 35,904
```

```
In [29]: train_datagen=ImageDataGenerator(preprocessing_function=preprocess_input) #included in
train_generator=train_datagen.flow_from_directory(train_path,
                                                    target_size=(224, 224),
                                                    color_mode='rgb',
                                                    batch_size=27,
                                                    class_mode='categorical',
                                                    shuffle=True)

test_datagen = ImageDataGenerator()

validation_generator = test_datagen.flow_from_directory(valid_path,
                                                         target_size=(224, 224),
                                                         color_mode='rgb',
```

```
batch_size=27,  
class_mode='categorical',  
shuffle=True)
```

Found 26508 images belonging to 9 classes.  
Found 11361 images belonging to 9 classes.

```
In [30]: #Images Classes with index  
print(train_generator.class_indices)
```

```
{'AD': 0, 'AL': 1, 'BL': 2, 'FR': 3, 'LA': 4, 'PM': 5, 'RE': 6, 'SA': 7, 'YE': 8}
```

```
In [31]: model.compile(optimizer=Adam(learning_rate=0.0001), loss='categorical_crossentropy', r
```

```
In [32]: start = datetime.datetime.now()  
  
history = model.fit_generator(generator=train_generator,  
                             steps_per_epoch=len(train_batches)//train_generator.batch_size,  
                             validation_data=valid_batches,  
                             validation_steps=len(valid_batches)//valid_batches.batch_size,  
                             epochs=135,  
                             verbose=2  
                             )  
  
end= datetime.datetime.now()  
elapsed= end-start  
print ('Time: ', elapsed)
```

C:\Users\GyasiEmmanuelKwabena\AppData\Local\Temp\ipykernel\_1972\700373186.py:3: UserWarning: `Model.fit\_generator` is deprecated and will be removed in a future version. Please use `Model.fit`, which supports generators.  
history = model.fit\_generator(generator=train\_generator,

Epoch 1/135  
44/44 - 115s - loss: 1.9643 - accuracy: 0.3039 - val\_loss: 1.7217 - val\_accuracy: 0.3  
874 - 115s/epoch - 3s/step  
Epoch 2/135  
44/44 - 112s - loss: 1.4124 - accuracy: 0.5059 - val\_loss: 1.5005 - val\_accuracy: 0.4  
723 - 112s/epoch - 3s/step  
Epoch 3/135  
44/44 - 111s - loss: 1.1662 - accuracy: 0.6044 - val\_loss: 1.2622 - val\_accuracy: 0.5  
672 - 111s/epoch - 3s/step  
Epoch 4/135  
44/44 - 111s - loss: 1.0615 - accuracy: 0.6246 - val\_loss: 1.2001 - val\_accuracy: 0.5  
751 - 111s/epoch - 3s/step  
Epoch 5/135  
44/44 - 107s - loss: 0.9944 - accuracy: 0.6448 - val\_loss: 1.0084 - val\_accuracy: 0.6  
186 - 107s/epoch - 2s/step  
Epoch 6/135  
44/44 - 108s - loss: 0.9571 - accuracy: 0.6650 - val\_loss: 0.9442 - val\_accuracy: 0.6  
542 - 108s/epoch - 2s/step  
Epoch 7/135  
44/44 - 108s - loss: 0.8624 - accuracy: 0.6853 - val\_loss: 0.9788 - val\_accuracy: 0.6  
304 - 108s/epoch - 2s/step  
Epoch 8/135  
44/44 - 113s - loss: 0.8390 - accuracy: 0.7130 - val\_loss: 0.8818 - val\_accuracy: 0.7  
036 - 113s/epoch - 3s/step  
Epoch 9/135  
44/44 - 107s - loss: 0.7848 - accuracy: 0.7290 - val\_loss: 1.0707 - val\_accuracy: 0.6  
423 - 107s/epoch - 2s/step  
Epoch 10/135  
44/44 - 107s - loss: 0.7739 - accuracy: 0.7508 - val\_loss: 0.8730 - val\_accuracy: 0.6  
818 - 107s/epoch - 2s/step  
Epoch 11/135  
44/44 - 107s - loss: 0.7287 - accuracy: 0.7534 - val\_loss: 0.8889 - val\_accuracy: 0.6  
838 - 107s/epoch - 2s/step  
Epoch 12/135  
44/44 - 108s - loss: 0.6927 - accuracy: 0.7584 - val\_loss: 0.8824 - val\_accuracy: 0.7  
194 - 108s/epoch - 2s/step  
Epoch 13/135  
44/44 - 108s - loss: 0.6444 - accuracy: 0.7719 - val\_loss: 0.8186 - val\_accuracy: 0.7  
095 - 108s/epoch - 2s/step  
Epoch 14/135  
44/44 - 107s - loss: 0.6160 - accuracy: 0.7828 - val\_loss: 0.7536 - val\_accuracy: 0.7  
451 - 107s/epoch - 2s/step  
Epoch 15/135  
44/44 - 108s - loss: 0.6192 - accuracy: 0.7854 - val\_loss: 0.9394 - val\_accuracy: 0.6  
739 - 108s/epoch - 2s/step  
Epoch 16/135  
44/44 - 108s - loss: 0.5918 - accuracy: 0.8022 - val\_loss: 0.7183 - val\_accuracy: 0.7  
569 - 108s/epoch - 2s/step  
Epoch 17/135  
44/44 - 107s - loss: 0.6400 - accuracy: 0.7826 - val\_loss: 0.6831 - val\_accuracy: 0.7  
510 - 107s/epoch - 2s/step  
Epoch 18/135  
44/44 - 108s - loss: 0.6112 - accuracy: 0.8022 - val\_loss: 0.8861 - val\_accuracy: 0.7  
095 - 108s/epoch - 2s/step  
Epoch 19/135  
44/44 - 107s - loss: 0.5661 - accuracy: 0.8106 - val\_loss: 0.8022 - val\_accuracy: 0.7  
431 - 107s/epoch - 2s/step  
Epoch 20/135  
44/44 - 108s - loss: 0.4987 - accuracy: 0.8367 - val\_loss: 0.8896 - val\_accuracy: 0.7  
134 - 108s/epoch - 2s/step

Epoch 21/135  
44/44 - 108s - loss: 0.4393 - accuracy: 0.8502 - val\_loss: 0.5767 - val\_accuracy: 0.8  
221 - 108s/epoch - 2s/step  
Epoch 22/135  
44/44 - 107s - loss: 0.4240 - accuracy: 0.8476 - val\_loss: 0.7681 - val\_accuracy: 0.7  
411 - 107s/epoch - 2s/step  
Epoch 23/135  
44/44 - 108s - loss: 0.4182 - accuracy: 0.8586 - val\_loss: 0.7298 - val\_accuracy: 0.7  
332 - 108s/epoch - 2s/step  
Epoch 24/135  
44/44 - 108s - loss: 0.4127 - accuracy: 0.8645 - val\_loss: 0.6072 - val\_accuracy: 0.7  
846 - 108s/epoch - 2s/step  
Epoch 25/135  
44/44 - 107s - loss: 0.3858 - accuracy: 0.8636 - val\_loss: 0.8269 - val\_accuracy: 0.7  
194 - 107s/epoch - 2s/step  
Epoch 26/135  
44/44 - 108s - loss: 0.3881 - accuracy: 0.8729 - val\_loss: 0.6657 - val\_accuracy: 0.7  
747 - 108s/epoch - 2s/step  
Epoch 27/135  
44/44 - 107s - loss: 0.3408 - accuracy: 0.8923 - val\_loss: 0.5421 - val\_accuracy: 0.8  
142 - 107s/epoch - 2s/step  
Epoch 28/135  
44/44 - 108s - loss: 0.3481 - accuracy: 0.8855 - val\_loss: 0.6279 - val\_accuracy: 0.7  
708 - 108s/epoch - 2s/step  
Epoch 29/135  
44/44 - 107s - loss: 0.3810 - accuracy: 0.8729 - val\_loss: 0.6358 - val\_accuracy: 0.7  
767 - 107s/epoch - 2s/step  
Epoch 30/135  
44/44 - 108s - loss: 0.3135 - accuracy: 0.8889 - val\_loss: 0.6309 - val\_accuracy: 0.7  
866 - 108s/epoch - 2s/step  
Epoch 31/135  
44/44 - 108s - loss: 0.3373 - accuracy: 0.8813 - val\_loss: 0.6847 - val\_accuracy: 0.7  
589 - 108s/epoch - 2s/step  
Epoch 32/135  
44/44 - 108s - loss: 0.3234 - accuracy: 0.8889 - val\_loss: 0.6742 - val\_accuracy: 0.8  
024 - 108s/epoch - 2s/step  
Epoch 33/135  
44/44 - 107s - loss: 0.2825 - accuracy: 0.9057 - val\_loss: 0.5435 - val\_accuracy: 0.8  
202 - 107s/epoch - 2s/step  
Epoch 34/135  
44/44 - 108s - loss: 0.2921 - accuracy: 0.8939 - val\_loss: 0.5156 - val\_accuracy: 0.8  
281 - 108s/epoch - 2s/step  
Epoch 35/135  
44/44 - 108s - loss: 0.2644 - accuracy: 0.9150 - val\_loss: 0.5092 - val\_accuracy: 0.8  
458 - 108s/epoch - 2s/step  
Epoch 36/135  
44/44 - 108s - loss: 0.2404 - accuracy: 0.9276 - val\_loss: 0.6046 - val\_accuracy: 0.8  
103 - 108s/epoch - 2s/step  
Epoch 37/135  
44/44 - 107s - loss: 0.2901 - accuracy: 0.9015 - val\_loss: 0.5524 - val\_accuracy: 0.8  
123 - 107s/epoch - 2s/step  
Epoch 38/135  
44/44 - 107s - loss: 0.2687 - accuracy: 0.9200 - val\_loss: 0.6336 - val\_accuracy: 0.7  
885 - 107s/epoch - 2s/step  
Epoch 39/135  
44/44 - 107s - loss: 0.2950 - accuracy: 0.8942 - val\_loss: 0.4425 - val\_accuracy: 0.8  
696 - 107s/epoch - 2s/step  
Epoch 40/135  
44/44 - 108s - loss: 0.2761 - accuracy: 0.9125 - val\_loss: 0.5996 - val\_accuracy: 0.8  
123 - 108s/epoch - 2s/step

Epoch 41/135  
44/44 - 111s - loss: 0.2496 - accuracy: 0.9251 - val\_loss: 0.4219 - val\_accuracy: 0.8  
617 - 111s/epoch - 3s/step  
Epoch 42/135  
44/44 - 108s - loss: 0.2307 - accuracy: 0.9184 - val\_loss: 0.4835 - val\_accuracy: 0.8  
557 - 108s/epoch - 2s/step  
Epoch 43/135  
44/44 - 108s - loss: 0.2390 - accuracy: 0.9234 - val\_loss: 0.5204 - val\_accuracy: 0.8  
103 - 108s/epoch - 2s/step  
Epoch 44/135  
44/44 - 108s - loss: 0.2521 - accuracy: 0.9150 - val\_loss: 0.6555 - val\_accuracy: 0.7  
964 - 108s/epoch - 2s/step  
Epoch 45/135  
44/44 - 108s - loss: 0.1942 - accuracy: 0.9377 - val\_loss: 0.4519 - val\_accuracy: 0.8  
538 - 108s/epoch - 2s/step  
Epoch 46/135  
44/44 - 107s - loss: 0.2081 - accuracy: 0.9268 - val\_loss: 0.5088 - val\_accuracy: 0.8  
300 - 107s/epoch - 2s/step  
Epoch 47/135  
44/44 - 118s - loss: 0.2159 - accuracy: 0.9276 - val\_loss: 0.7104 - val\_accuracy: 0.7  
905 - 118s/epoch - 3s/step  
Epoch 48/135  
44/44 - 119s - loss: 0.1960 - accuracy: 0.9276 - val\_loss: 0.5685 - val\_accuracy: 0.8  
182 - 119s/epoch - 3s/step  
Epoch 49/135  
44/44 - 120s - loss: 0.1844 - accuracy: 0.9369 - val\_loss: 0.4434 - val\_accuracy: 0.8  
478 - 120s/epoch - 3s/step  
Epoch 50/135  
44/44 - 120s - loss: 0.1892 - accuracy: 0.9419 - val\_loss: 0.3575 - val\_accuracy: 0.8  
913 - 120s/epoch - 3s/step  
Epoch 51/135  
44/44 - 112s - loss: 0.1755 - accuracy: 0.9436 - val\_loss: 0.4692 - val\_accuracy: 0.8  
577 - 112s/epoch - 3s/step  
Epoch 52/135  
44/44 - 109s - loss: 0.1546 - accuracy: 0.9478 - val\_loss: 0.3678 - val\_accuracy: 0.8  
814 - 109s/epoch - 2s/step  
Epoch 53/135  
44/44 - 108s - loss: 0.2003 - accuracy: 0.9411 - val\_loss: 0.4305 - val\_accuracy: 0.8  
735 - 108s/epoch - 2s/step  
Epoch 54/135  
44/44 - 108s - loss: 0.2079 - accuracy: 0.9335 - val\_loss: 0.3648 - val\_accuracy: 0.8  
854 - 108s/epoch - 2s/step  
Epoch 55/135  
44/44 - 109s - loss: 0.2055 - accuracy: 0.9386 - val\_loss: 0.4005 - val\_accuracy: 0.8  
696 - 109s/epoch - 2s/step  
Epoch 56/135  
44/44 - 108s - loss: 0.1652 - accuracy: 0.9450 - val\_loss: 0.5542 - val\_accuracy: 0.8  
340 - 108s/epoch - 2s/step  
Epoch 57/135  
44/44 - 110s - loss: 0.1681 - accuracy: 0.9478 - val\_loss: 0.4799 - val\_accuracy: 0.8  
399 - 110s/epoch - 2s/step  
Epoch 58/135  
44/44 - 109s - loss: 0.1565 - accuracy: 0.9478 - val\_loss: 0.3892 - val\_accuracy: 0.8  
794 - 109s/epoch - 2s/step  
Epoch 59/135  
44/44 - 110s - loss: 0.1290 - accuracy: 0.9554 - val\_loss: 0.4611 - val\_accuracy: 0.8  
755 - 110s/epoch - 3s/step  
Epoch 60/135  
44/44 - 109s - loss: 0.1326 - accuracy: 0.9554 - val\_loss: 0.4140 - val\_accuracy: 0.8  
676 - 109s/epoch - 2s/step

Epoch 61/135  
44/44 - 110s - loss: 0.1264 - accuracy: 0.9579 - val\_loss: 0.4125 - val\_accuracy: 0.8735 - 110s/epoch - 3s/step

Epoch 62/135  
44/44 - 110s - loss: 0.1506 - accuracy: 0.9545 - val\_loss: 0.4685 - val\_accuracy: 0.8557 - 110s/epoch - 2s/step

Epoch 63/135  
44/44 - 111s - loss: 0.1707 - accuracy: 0.9436 - val\_loss: 0.5943 - val\_accuracy: 0.8162 - 111s/epoch - 3s/step

Epoch 64/135  
44/44 - 109s - loss: 0.1632 - accuracy: 0.9335 - val\_loss: 0.4667 - val\_accuracy: 0.8617 - 109s/epoch - 2s/step

Epoch 65/135  
44/44 - 110s - loss: 0.1673 - accuracy: 0.9461 - val\_loss: 0.3561 - val\_accuracy: 0.8933 - 110s/epoch - 3s/step

Epoch 66/135  
44/44 - 111s - loss: 0.1153 - accuracy: 0.9621 - val\_loss: 0.3567 - val\_accuracy: 0.8794 - 111s/epoch - 3s/step

Epoch 67/135  
44/44 - 111s - loss: 0.1274 - accuracy: 0.9577 - val\_loss: 0.4520 - val\_accuracy: 0.8814 - 111s/epoch - 3s/step

Epoch 68/135  
44/44 - 110s - loss: 0.1167 - accuracy: 0.9638 - val\_loss: 0.4170 - val\_accuracy: 0.8834 - 110s/epoch - 3s/step

Epoch 69/135  
44/44 - 110s - loss: 0.1196 - accuracy: 0.9604 - val\_loss: 0.4094 - val\_accuracy: 0.8775 - 110s/epoch - 2s/step

Epoch 70/135  
44/44 - 111s - loss: 0.1403 - accuracy: 0.9478 - val\_loss: 0.4735 - val\_accuracy: 0.8617 - 111s/epoch - 3s/step

Epoch 71/135  
44/44 - 111s - loss: 0.1435 - accuracy: 0.9537 - val\_loss: 0.5254 - val\_accuracy: 0.8577 - 111s/epoch - 3s/step

Epoch 72/135  
44/44 - 111s - loss: 0.1371 - accuracy: 0.9638 - val\_loss: 0.4595 - val\_accuracy: 0.8814 - 111s/epoch - 3s/step

Epoch 73/135  
44/44 - 112s - loss: 0.1255 - accuracy: 0.9520 - val\_loss: 0.3864 - val\_accuracy: 0.8834 - 112s/epoch - 3s/step

Epoch 74/135  
44/44 - 118s - loss: 0.0817 - accuracy: 0.9773 - val\_loss: 0.4611 - val\_accuracy: 0.8874 - 118s/epoch - 3s/step

Epoch 75/135  
44/44 - 112s - loss: 0.1334 - accuracy: 0.9630 - val\_loss: 0.5299 - val\_accuracy: 0.8498 - 112s/epoch - 3s/step

Epoch 76/135  
44/44 - 114s - loss: 0.1318 - accuracy: 0.9562 - val\_loss: 0.4291 - val\_accuracy: 0.8893 - 114s/epoch - 3s/step

Epoch 77/135  
44/44 - 113s - loss: 0.1344 - accuracy: 0.9571 - val\_loss: 0.5749 - val\_accuracy: 0.8518 - 113s/epoch - 3s/step

Epoch 78/135  
44/44 - 112s - loss: 0.1194 - accuracy: 0.9638 - val\_loss: 0.5399 - val\_accuracy: 0.8419 - 112s/epoch - 3s/step

Epoch 79/135  
44/44 - 112s - loss: 0.1195 - accuracy: 0.9630 - val\_loss: 0.5632 - val\_accuracy: 0.8202 - 112s/epoch - 3s/step

Epoch 80/135  
44/44 - 111s - loss: 0.1024 - accuracy: 0.9680 - val\_loss: 0.4331 - val\_accuracy: 0.8735 - 111s/epoch - 3s/step

Epoch 81/135  
44/44 - 111s - loss: 0.1379 - accuracy: 0.9596 - val\_loss: 0.5515 - val\_accuracy: 0.8  
518 - 111s/epoch - 3s/step  
Epoch 82/135  
44/44 - 112s - loss: 0.1223 - accuracy: 0.9554 - val\_loss: 0.5360 - val\_accuracy: 0.8  
379 - 112s/epoch - 3s/step  
Epoch 83/135  
44/44 - 112s - loss: 0.1129 - accuracy: 0.9646 - val\_loss: 0.4430 - val\_accuracy: 0.8  
538 - 112s/epoch - 3s/step  
Epoch 84/135  
44/44 - 112s - loss: 0.0871 - accuracy: 0.9646 - val\_loss: 0.6311 - val\_accuracy: 0.8  
360 - 112s/epoch - 3s/step  
Epoch 85/135  
44/44 - 111s - loss: 0.1216 - accuracy: 0.9571 - val\_loss: 0.5109 - val\_accuracy: 0.8  
656 - 111s/epoch - 3s/step  
Epoch 86/135  
44/44 - 112s - loss: 0.1119 - accuracy: 0.9663 - val\_loss: 0.5087 - val\_accuracy: 0.8  
617 - 112s/epoch - 3s/step  
Epoch 87/135  
44/44 - 112s - loss: 0.1379 - accuracy: 0.9579 - val\_loss: 0.4302 - val\_accuracy: 0.8  
557 - 112s/epoch - 3s/step  
Epoch 88/135  
44/44 - 111s - loss: 0.1264 - accuracy: 0.9596 - val\_loss: 0.4859 - val\_accuracy: 0.8  
518 - 111s/epoch - 3s/step  
Epoch 89/135  
44/44 - 112s - loss: 0.1073 - accuracy: 0.9655 - val\_loss: 0.4251 - val\_accuracy: 0.8  
854 - 112s/epoch - 3s/step  
Epoch 90/135  
44/44 - 111s - loss: 0.0957 - accuracy: 0.9663 - val\_loss: 0.4354 - val\_accuracy: 0.8  
834 - 111s/epoch - 3s/step  
Epoch 91/135  
44/44 - 112s - loss: 0.1025 - accuracy: 0.9680 - val\_loss: 0.4127 - val\_accuracy: 0.8  
874 - 112s/epoch - 3s/step  
Epoch 92/135  
44/44 - 112s - loss: 0.1209 - accuracy: 0.9562 - val\_loss: 0.2961 - val\_accuracy: 0.9  
012 - 112s/epoch - 3s/step  
Epoch 93/135  
44/44 - 112s - loss: 0.1179 - accuracy: 0.9628 - val\_loss: 0.4529 - val\_accuracy: 0.8  
715 - 112s/epoch - 3s/step  
Epoch 94/135  
44/44 - 111s - loss: 0.1026 - accuracy: 0.9613 - val\_loss: 0.3650 - val\_accuracy: 0.9  
012 - 111s/epoch - 3s/step  
Epoch 95/135  
44/44 - 112s - loss: 0.1019 - accuracy: 0.9689 - val\_loss: 0.5867 - val\_accuracy: 0.8  
538 - 112s/epoch - 3s/step  
Epoch 96/135  
44/44 - 111s - loss: 0.1050 - accuracy: 0.9630 - val\_loss: 0.4031 - val\_accuracy: 0.8  
834 - 111s/epoch - 3s/step  
Epoch 97/135  
44/44 - 111s - loss: 0.0873 - accuracy: 0.9672 - val\_loss: 0.4630 - val\_accuracy: 0.8  
755 - 111s/epoch - 3s/step  
Epoch 98/135  
44/44 - 112s - loss: 0.1079 - accuracy: 0.9630 - val\_loss: 0.5294 - val\_accuracy: 0.8  
538 - 112s/epoch - 3s/step  
Epoch 99/135  
44/44 - 111s - loss: 0.0909 - accuracy: 0.9672 - val\_loss: 0.3111 - val\_accuracy: 0.9  
071 - 111s/epoch - 3s/step  
Epoch 100/135  
44/44 - 112s - loss: 0.0728 - accuracy: 0.9714 - val\_loss: 0.2941 - val\_accuracy: 0.9  
150 - 112s/epoch - 3s/step

Epoch 101/135  
44/44 - 112s - loss: 0.1050 - accuracy: 0.9638 - val\_loss: 0.2619 - val\_accuracy: 0.9  
170 - 112s/epoch - 3s/step  
Epoch 102/135  
44/44 - 112s - loss: 0.0692 - accuracy: 0.9747 - val\_loss: 0.4539 - val\_accuracy: 0.8  
775 - 112s/epoch - 3s/step  
Epoch 103/135  
44/44 - 111s - loss: 0.0854 - accuracy: 0.9680 - val\_loss: 0.3114 - val\_accuracy: 0.9  
091 - 111s/epoch - 3s/step  
Epoch 104/135  
44/44 - 112s - loss: 0.1130 - accuracy: 0.9672 - val\_loss: 0.3574 - val\_accuracy: 0.8  
676 - 112s/epoch - 3s/step  
Epoch 105/135  
44/44 - 111s - loss: 0.0872 - accuracy: 0.9722 - val\_loss: 0.3758 - val\_accuracy: 0.8  
992 - 111s/epoch - 3s/step  
Epoch 106/135  
44/44 - 116s - loss: 0.1195 - accuracy: 0.9638 - val\_loss: 0.3113 - val\_accuracy: 0.9  
170 - 116s/epoch - 3s/step  
Epoch 107/135  
44/44 - 113s - loss: 0.0794 - accuracy: 0.9739 - val\_loss: 0.3893 - val\_accuracy: 0.8  
913 - 113s/epoch - 3s/step  
Epoch 108/135  
44/44 - 112s - loss: 0.1129 - accuracy: 0.9596 - val\_loss: 0.5391 - val\_accuracy: 0.8  
498 - 112s/epoch - 3s/step  
Epoch 109/135  
44/44 - 112s - loss: 0.0812 - accuracy: 0.9714 - val\_loss: 0.3582 - val\_accuracy: 0.9  
071 - 112s/epoch - 3s/step  
Epoch 110/135  
44/44 - 112s - loss: 0.0669 - accuracy: 0.9756 - val\_loss: 0.4542 - val\_accuracy: 0.8  
676 - 112s/epoch - 3s/step  
Epoch 111/135  
44/44 - 113s - loss: 0.0676 - accuracy: 0.9798 - val\_loss: 0.3915 - val\_accuracy: 0.8  
953 - 113s/epoch - 3s/step  
Epoch 112/135  
44/44 - 112s - loss: 0.0642 - accuracy: 0.9790 - val\_loss: 0.4212 - val\_accuracy: 0.8  
933 - 112s/epoch - 3s/step  
Epoch 113/135  
44/44 - 113s - loss: 0.0754 - accuracy: 0.9764 - val\_loss: 0.4139 - val\_accuracy: 0.8  
893 - 113s/epoch - 3s/step  
Epoch 114/135  
44/44 - 113s - loss: 0.0658 - accuracy: 0.9815 - val\_loss: 0.6727 - val\_accuracy: 0.8  
162 - 113s/epoch - 3s/step  
Epoch 115/135  
44/44 - 112s - loss: 0.0819 - accuracy: 0.9773 - val\_loss: 0.4391 - val\_accuracy: 0.8  
972 - 112s/epoch - 3s/step  
Epoch 116/135  
44/44 - 113s - loss: 0.0788 - accuracy: 0.9731 - val\_loss: 0.4211 - val\_accuracy: 0.8  
794 - 113s/epoch - 3s/step  
Epoch 117/135  
44/44 - 112s - loss: 0.0697 - accuracy: 0.9773 - val\_loss: 0.4373 - val\_accuracy: 0.8  
972 - 112s/epoch - 3s/step  
Epoch 118/135  
44/44 - 113s - loss: 0.0687 - accuracy: 0.9731 - val\_loss: 0.2872 - val\_accuracy: 0.9  
229 - 113s/epoch - 3s/step  
Epoch 119/135  
44/44 - 113s - loss: 0.0631 - accuracy: 0.9798 - val\_loss: 0.6382 - val\_accuracy: 0.8  
439 - 113s/epoch - 3s/step  
Epoch 120/135  
44/44 - 113s - loss: 0.0755 - accuracy: 0.9731 - val\_loss: 0.4946 - val\_accuracy: 0.8  
676 - 113s/epoch - 3s/step

```

Epoch 121/135
44/44 - 112s - loss: 0.0930 - accuracy: 0.9672 - val_loss: 0.4392 - val_accuracy: 0.8
893 - 112s/epoch - 3s/step
Epoch 122/135
44/44 - 113s - loss: 0.1065 - accuracy: 0.9689 - val_loss: 0.3376 - val_accuracy: 0.9
012 - 113s/epoch - 3s/step
Epoch 123/135
44/44 - 114s - loss: 0.0775 - accuracy: 0.9790 - val_loss: 0.5674 - val_accuracy: 0.8
676 - 114s/epoch - 3s/step
Epoch 124/135
44/44 - 112s - loss: 0.0916 - accuracy: 0.9689 - val_loss: 0.4543 - val_accuracy: 0.8
893 - 112s/epoch - 3s/step
Epoch 125/135
44/44 - 114s - loss: 0.0845 - accuracy: 0.9756 - val_loss: 0.3850 - val_accuracy: 0.8
874 - 114s/epoch - 3s/step
Epoch 126/135
44/44 - 114s - loss: 0.0686 - accuracy: 0.9781 - val_loss: 0.4696 - val_accuracy: 0.8
854 - 114s/epoch - 3s/step
Epoch 127/135
44/44 - 112s - loss: 0.0860 - accuracy: 0.9714 - val_loss: 0.3663 - val_accuracy: 0.8
992 - 112s/epoch - 3s/step
Epoch 128/135
44/44 - 113s - loss: 0.0713 - accuracy: 0.9798 - val_loss: 0.4435 - val_accuracy: 0.8
893 - 113s/epoch - 3s/step
Epoch 129/135
44/44 - 113s - loss: 0.0999 - accuracy: 0.9663 - val_loss: 0.3398 - val_accuracy: 0.9
150 - 113s/epoch - 3s/step
Epoch 130/135
44/44 - 112s - loss: 0.0724 - accuracy: 0.9705 - val_loss: 0.5148 - val_accuracy: 0.8
735 - 112s/epoch - 3s/step
Epoch 131/135
44/44 - 114s - loss: 0.0721 - accuracy: 0.9756 - val_loss: 0.4415 - val_accuracy: 0.8
814 - 114s/epoch - 3s/step
Epoch 132/135
44/44 - 112s - loss: 0.0825 - accuracy: 0.9722 - val_loss: 0.5198 - val_accuracy: 0.8
676 - 112s/epoch - 3s/step
Epoch 133/135
44/44 - 112s - loss: 0.1018 - accuracy: 0.9697 - val_loss: 0.3470 - val_accuracy: 0.9
051 - 112s/epoch - 3s/step
Epoch 134/135
44/44 - 113s - loss: 0.1025 - accuracy: 0.9663 - val_loss: 0.5546 - val_accuracy: 0.8
419 - 113s/epoch - 3s/step
Epoch 135/135
44/44 - 113s - loss: 0.0632 - accuracy: 0.9806 - val_loss: 0.2680 - val_accuracy: 0.9
289 - 113s/epoch - 3s/step
Time: 4:09:07.818492

```

```
In [33]: score = model.evaluate(train_generator, verbose=0)
print("Accuracy: %.2f%%" % (score[1]*100))
```

Accuracy: 98.47%

```
In [34]: model.metrics_names
```

```
Out[34]: ['loss', 'accuracy']
```

```
In [35]: score
```

```
Out[35]: [0.04696470499038696, 0.9847216010093689]
```

```
In [36]: loss = history.history['loss']
val_loss = history.history['val_loss']
epochs = range(1, len(loss) + 1)
plt.plot(epochs, loss, 'g', label='Training loss')
plt.plot(epochs, val_loss, 'b', label='Validation loss')
plt.title('Training and validation loss')
plt.xlabel('Epochs')
plt.ylabel('Loss')
plt.legend()
plt.show()

acc = history.history['accuracy']
val_acc = history.history['val_accuracy']
plt.plot(epochs, acc, 'r', label='Training acc')
plt.plot(epochs, val_acc, 'y', label='Validation acc')
plt.title('Training and validation accuracy')
plt.xlabel('Epochs')
plt.ylabel('Accuracy')
plt.legend()
plt.show()
```

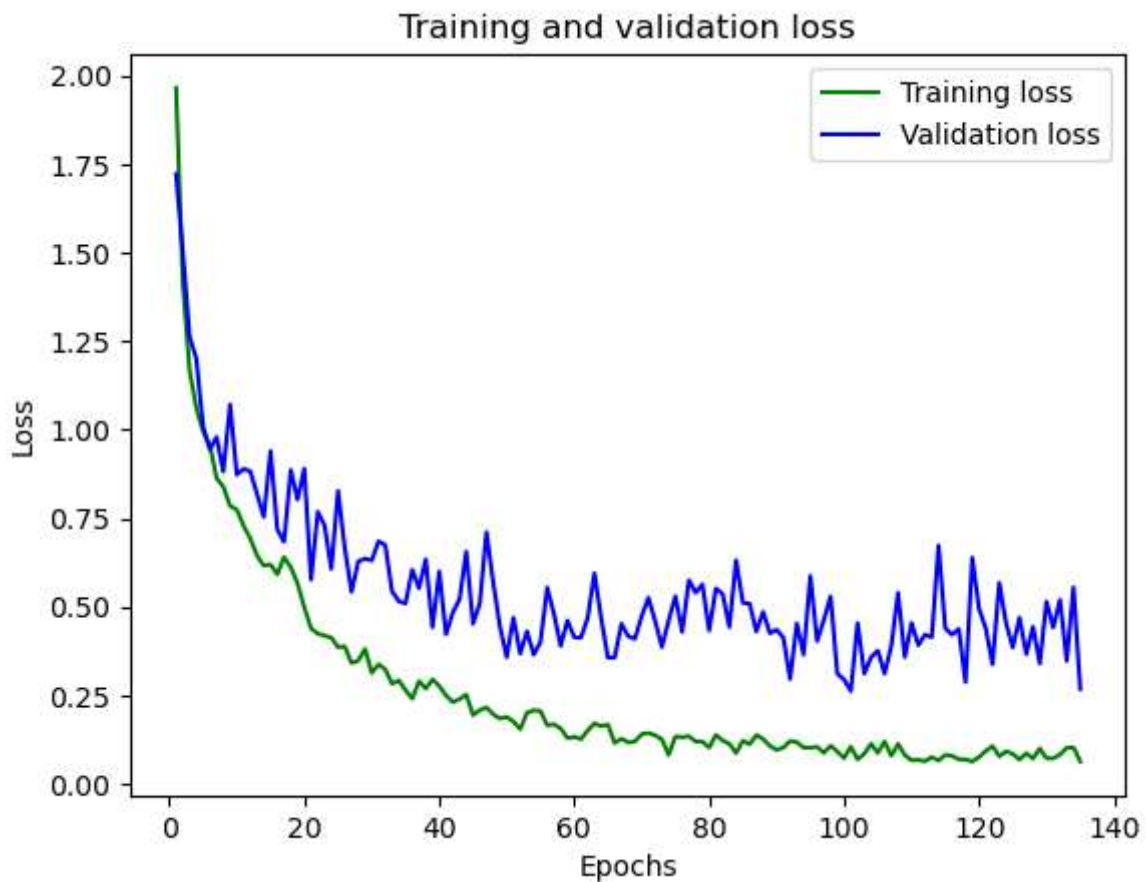

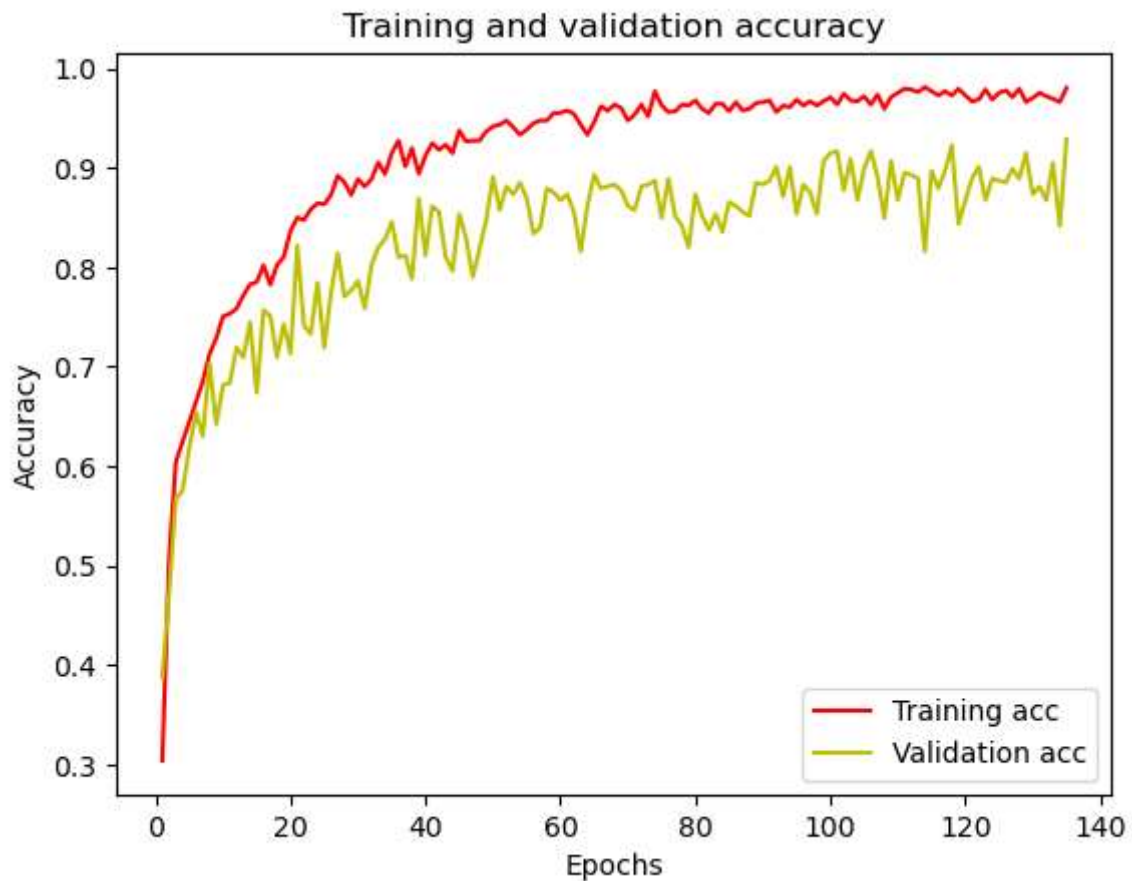

```
In [37]: class_labels = ["AD", "AL", "BL", "FR", "LA", "PM", "RE", "SA", "YE"]
from sklearn.metrics import classification_report
test_labels = test_batches.classes
predictions = model.predict(test_batches, steps=len(test_batches), verbose=0)
y_pred = np.argmax(predictions, axis=-1)
print(classification_report(test_labels, y_pred, target_names=class_labels))
```

|              | precision | recall | f1-score | support |
|--------------|-----------|--------|----------|---------|
| AD           | 1.00      | 0.97   | 0.99     | 40      |
| AL           | 0.87      | 0.82   | 0.85     | 40      |
| BL           | 0.98      | 1.00   | 0.99     | 40      |
| FR           | 0.95      | 0.93   | 0.94     | 40      |
| LA           | 0.97      | 0.85   | 0.91     | 40      |
| PM           | 0.97      | 0.93   | 0.95     | 40      |
| RE           | 0.95      | 0.93   | 0.94     | 40      |
| SA           | 0.89      | 1.00   | 0.94     | 40      |
| YE           | 0.85      | 0.97   | 0.91     | 40      |
| accuracy     |           |        | 0.93     | 360     |
| macro avg    | 0.94      | 0.93   | 0.93     | 360     |
| weighted avg | 0.94      | 0.93   | 0.93     | 360     |

```
In [38]: test_labels = test_batches.classes
```

```
In [39]: predictions = model.predict(x=test_batches, steps=len(test_batches), verbose=0)
```

```
In [40]: cm = confusion_matrix(y_true=test_batches.classes, y_pred= np.argmax(predictions,axis=
```

In [41]: *#Plot the confusion matrix. Set Normalize = True/False*

```
def plot_confusion_matrix(cm, classes, normalize=True, title='Confusion matrix', cmap=
    """
    This function prints and plots the confusion matrix.
    Normalization can be applied by setting `normalize=True`.
    """

    plt.figure(figsize=(8,6))

    plt.imshow(cm, interpolation='nearest', cmap=cmap)

    plt.title(title)

    plt.colorbar()

    tick_marks = np.arange(len(classes))

    plt.xticks(tick_marks, classes, rotation=45)

    plt.yticks(tick_marks, classes)

    if normalize:

        cm = cm.astype('float') / cm.sum(axis=1)[:, np.newaxis]
        cm = np.around(cm, decimals=2)
        cm[np.isnan(cm)] = 0.0

        print("Normalized confusion matrix")

    else:

        print('Confusion matrix, without normalization')

    thresh = cm.max() / 2.

    for i, j in itertools.product(range(cm.shape[0]), range(cm.shape[1])):

        plt.text(j, i, cm[i, j],

                horizontalalignment="center",
                fontsize="15",

                color="white" if cm[i, j] > thresh else "black")

    plt.tight_layout()

    plt.ylabel('True label')
```

```
plt.xlabel('Predicted label')
```

```
In [42]: cm_plot_labels = ["AD", "AL", "BL", "FR", "LA", "PM", "RE", "SA", "YE"]
plot_confusion_matrix(cm=cm, classes=cm_plot_labels, title='Confusion Matrix')
```

Normalized confusion matrix

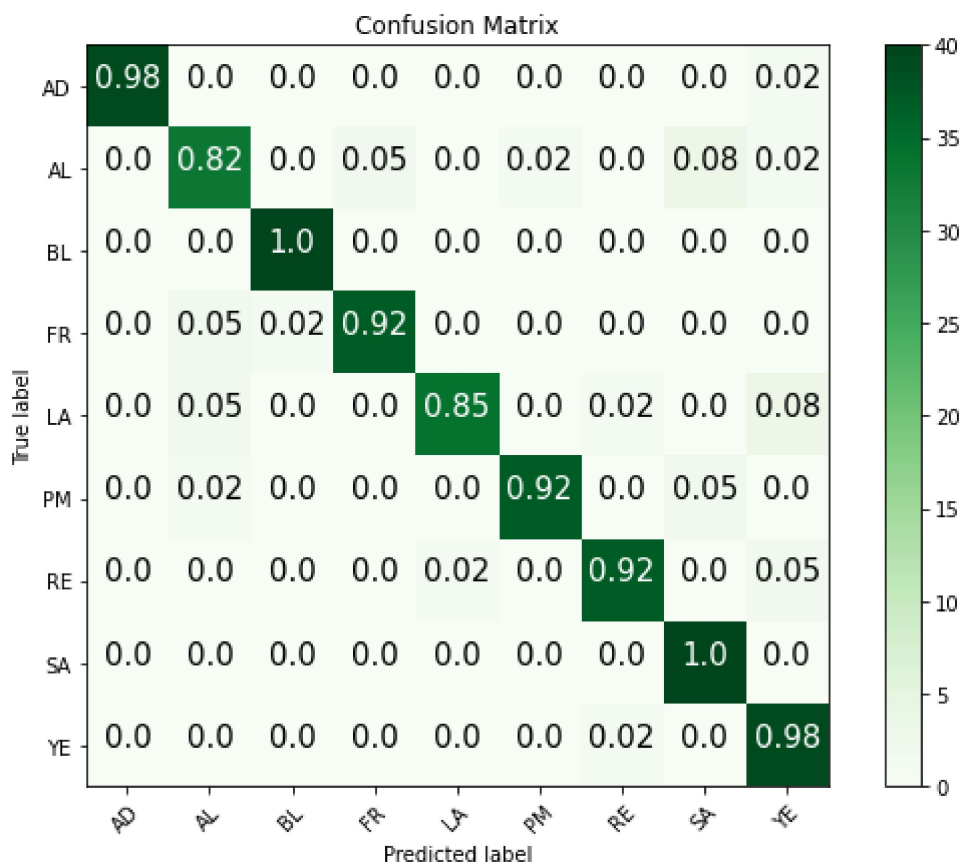

```
In [43]: testX, testy = test_batches.next()
print('test shape=%s, min=%.3f, max=%.3f' % (testX.shape, testX.min(), testX.max()))

test shape=(360, 224, 224, 3), min=-1.000, max=1.000
```

```
In [44]: #making a prediction about our test data

#checking the prediction shape
predictions.shape
```

```
Out[44]: (360, 9)
```

```
In [45]: #checking the batch shape
testX.shape
```

```
Out[45]: (360, 224, 224, 3)
```

```
In [46]: predictions= model.predict(testX)
```

12/12 [=====] - 8s 644ms/step

```
In [47]: test_loss, test_accuracy = model.evaluate(testX, testy)
```

12/12 [=====] - 8s 689ms/step - loss: 0.7201 - accuracy: 0.8389

In [48]: predictions[0]

Out[48]: array([9.9995685e-01, 4.0995194e-05, 3.4780383e-11, 1.6994771e-10,  
4.2968284e-07, 2.1204228e-07, 1.3828451e-06, 2.1488589e-08,  
3.5806341e-08], dtype=float32)

In [49]: plt.figure()  
plt.imshow(testX[0])  
plt.colorbar()  
plt.show()

Clipping input data to the valid range for imshow with RGB data ([0..1] for floats or [0..255] for integers).

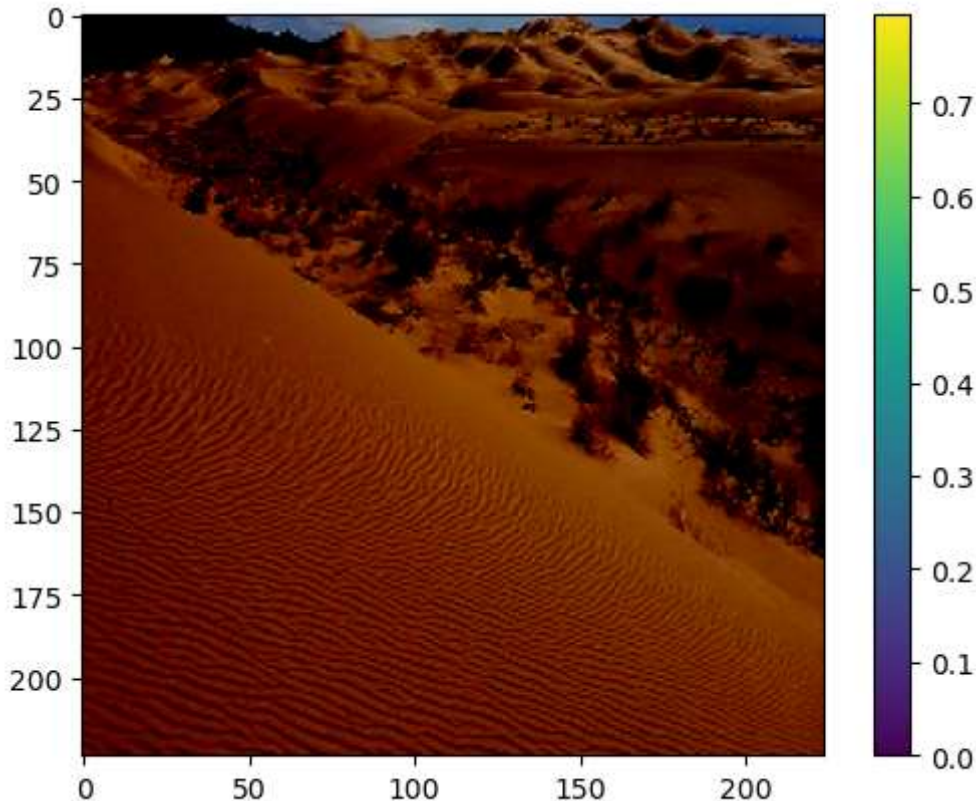

In [50]: *# function to plot an image*  
def plot\_image(i, predictions\_array, true\_label, img):  
 predictions\_array, true\_label, img=predictions\_array, true\_label[i], img[i]  
 plt.grid(False)  
 plt.xticks([])  
 plt.yticks([])  
  
 plt.imshow(img, cmap=plt.cm.gray)  
  
 predicted\_label = np.argmax(predictions\_array)  
 if predicted\_label!=true\_label:  
 color='blue'  
 plt.xlabel("{} {:.20f}% ({})." .format(class\_names[predicted\_label],  
 100\*np.max(predictions\_array),  
 class\_names[true\_label]),  
 color=color)  
 else:

```

color='red'
plt.xlabel("{} {:.20f}% ({}).format(class_names[predicted_label],
                                   100*np.max(predictions_array),
                                   class_names[true_label]),
           color=color)

#functions to create bar plot of the predictions
def plot_value_array(i, predictions_array, true_label):
    predictions_array, true_label = predictions_array, true_label[i]
    plt.grid(False)
    plt.xticks(range(9))
    plt.yticks([])
    thisplot = plt.bar(range(9), predictions_array, color="#777777")
    plt.ylim([0, 1])
    predicted_label=np.argmax(predictions_array)

    thisplot[predicted_label].set_color('red')
    thisplot[true_label].set_color('blue')

```

In [51]: `class_names = ["Arid", "Alluvial", "Black", "Forest", "Laterite", "Peaty/Marshy", "Red"]`

In [52]: `for i in range(9):
 plt.figure(figsize=(6,3))
 plt.subplot(1,2,1)
 plot_image(i, predictions[i], test_labels, testX)
 plt.subplot(1,2,2)
 plot_value_array(i, predictions[i], test_labels)
 plt.show()`

Clipping input data to the valid range for imshow with RGB data ([0..1] for floats or [0..255] for integers).

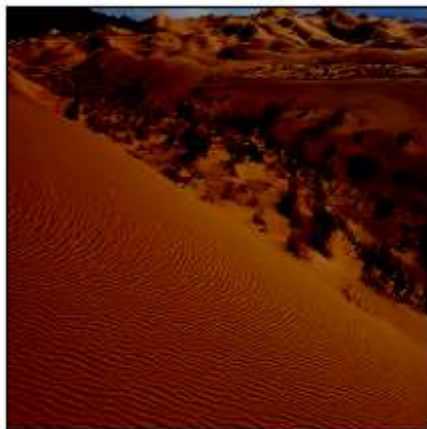

Arid 100% (Arid)

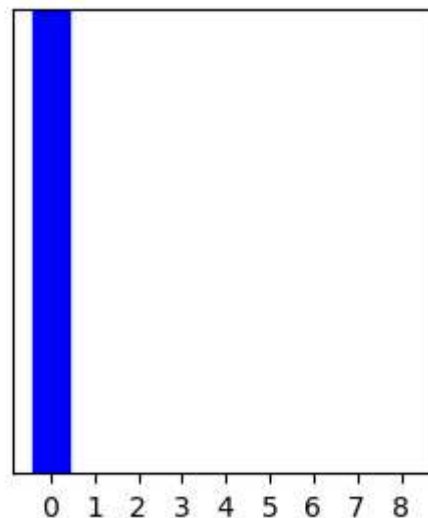

Clipping input data to the valid range for imshow with RGB data ([0..1] for floats or [0..255] for integers).

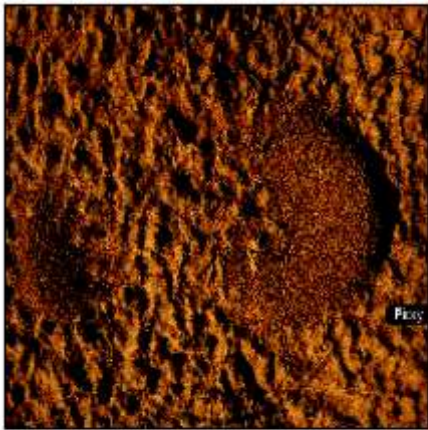

Arid 93% (Arid)

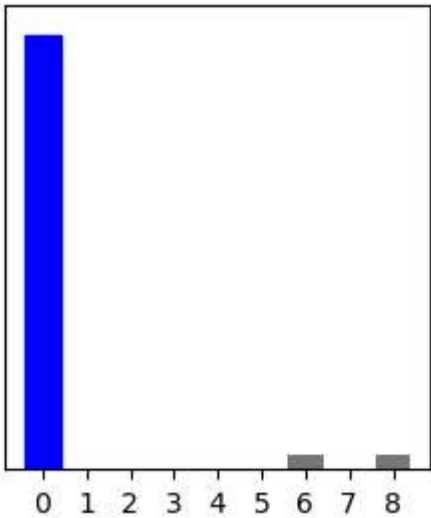

Clipping input data to the valid range for imshow with RGB data ([0..1] for floats or [0..255] for integers).

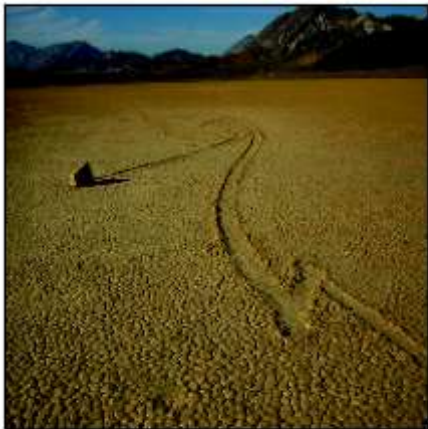

Arid 100% (Arid)

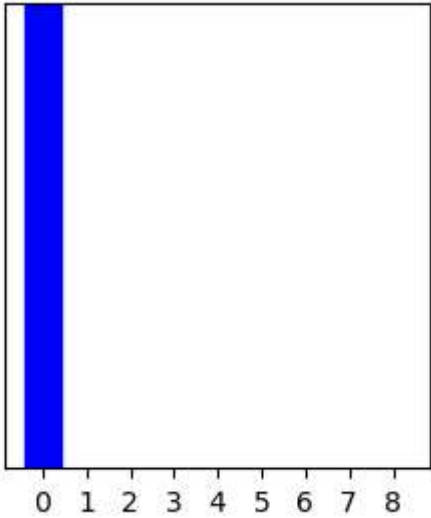

Clipping input data to the valid range for imshow with RGB data ([0..1] for floats or [0..255] for integers).

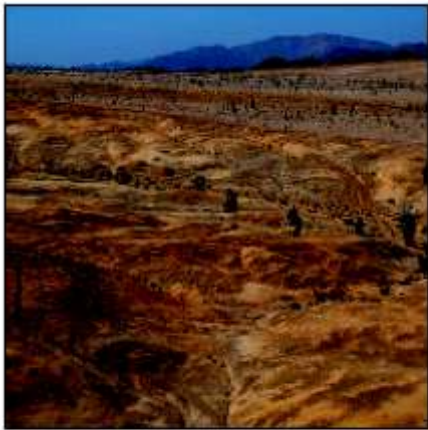

Arid 100% (Arid)

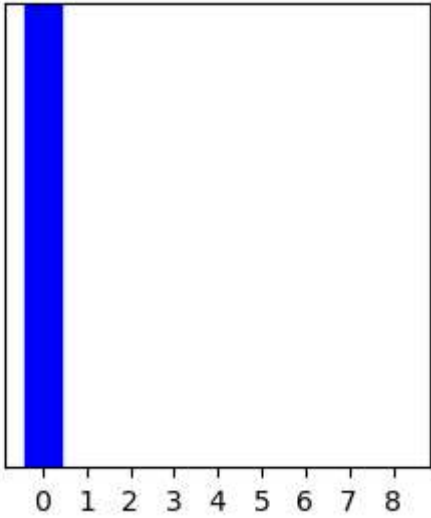

Clipping input data to the valid range for imshow with RGB data ([0..1] for floats or [0..255] for integers).

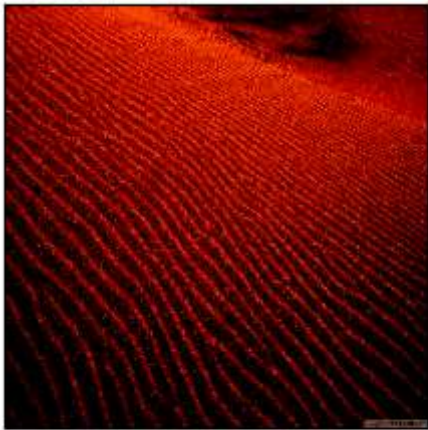

Arid 100% (Arid)

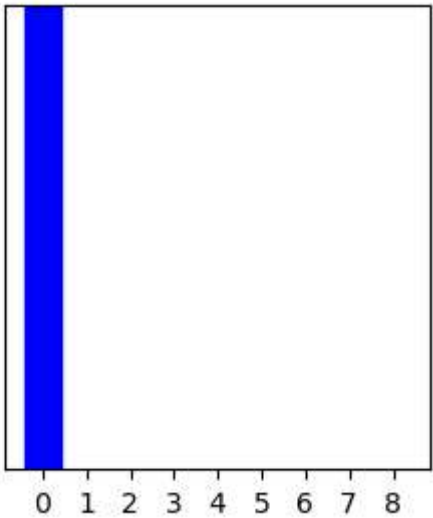

Clipping input data to the valid range for imshow with RGB data ([0..1] for floats or [0..255] for integers).

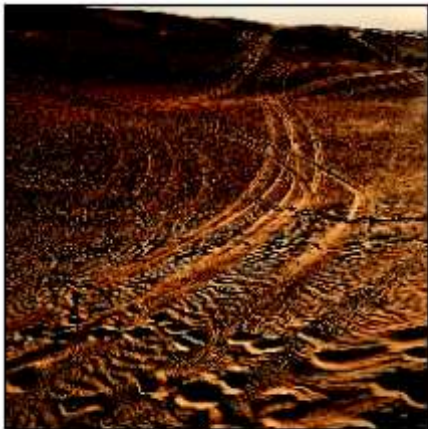

Arid 100% (Arid)

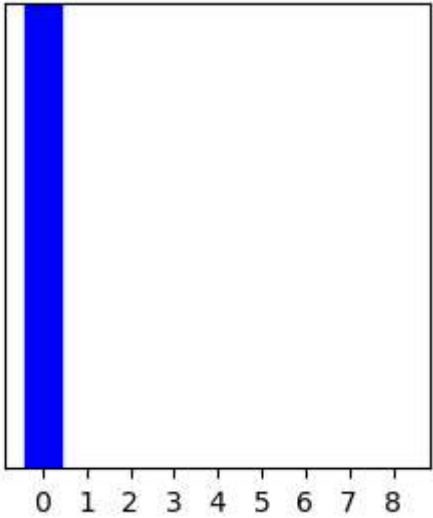

Clipping input data to the valid range for imshow with RGB data ([0..1] for floats or [0..255] for integers).

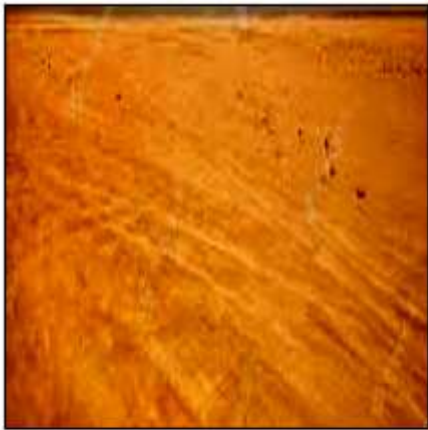

Arid 100% (Arid)

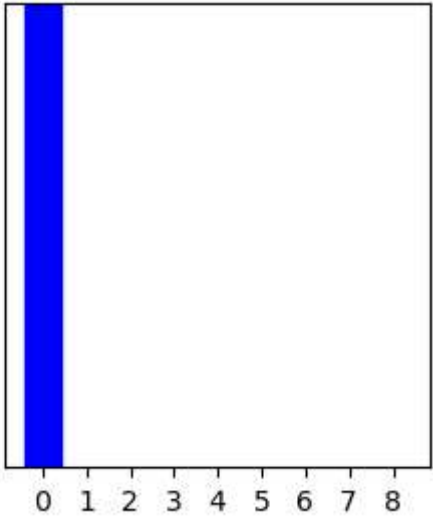

Clipping input data to the valid range for imshow with RGB data ([0..1] for floats or [0..255] for integers).

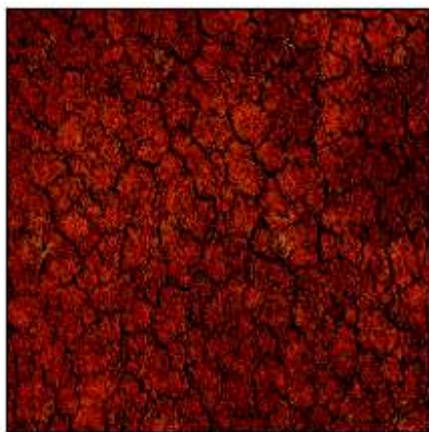

Arid 100% (Arid)

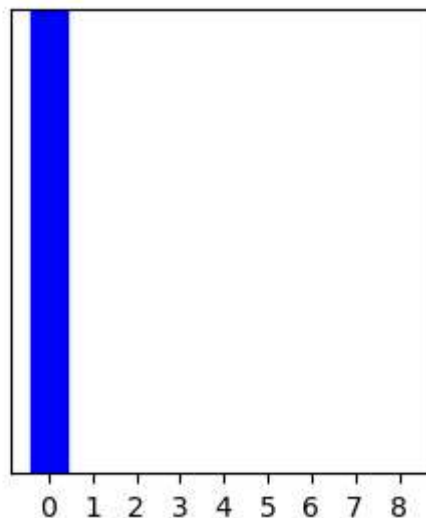

Clipping input data to the valid range for imshow with RGB data ([0..1] for floats or [0..255] for integers).

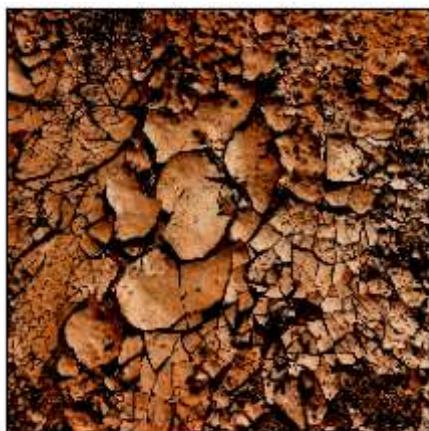

Arid 100% (Arid)

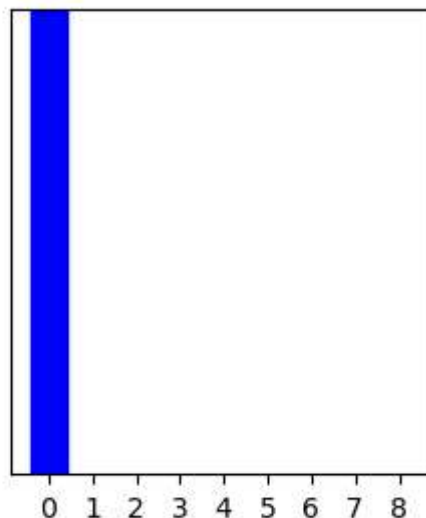

```
In [53]: i=40
plt.figure(figsize=(6,3))
plt.subplot(1,2,1)
plot_image(i, predictions[i], test_labels, testX)
plt.subplot(1,2,2)
plot_value_array(i, predictions[i], test_labels)
plt.show()
```

Clipping input data to the valid range for imshow with RGB data ([0..1] for floats or [0..255] for integers).

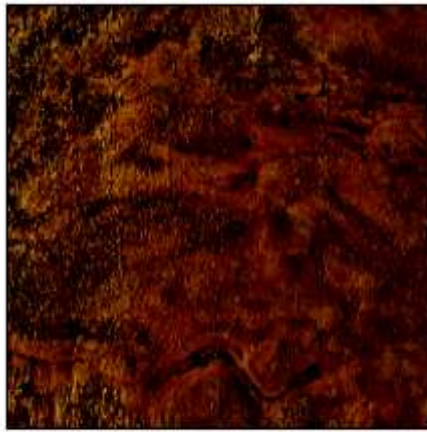

Alluvial 93% (Alluvial)

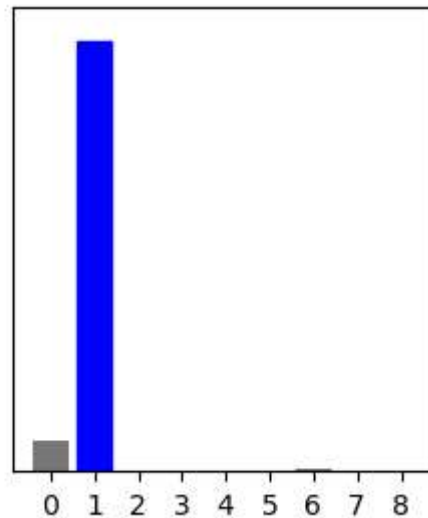

```
In [54]: i=60
plt.figure(figsize=(6,3))
plt.subplot(1,2,1)
plot_image(i, predictions[i], test_labels, testX)
plt.subplot(1,2,2)
plot_value_array(i, predictions[i], test_labels)
plt.show()
```

Clipping input data to the valid range for imshow with RGB data ([0..1] for floats or [0..255] for integers).

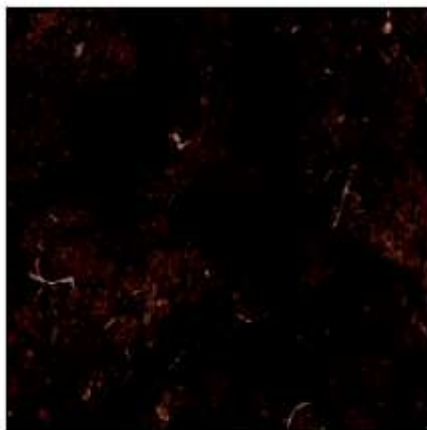

Alluvial 99% (Alluvial)

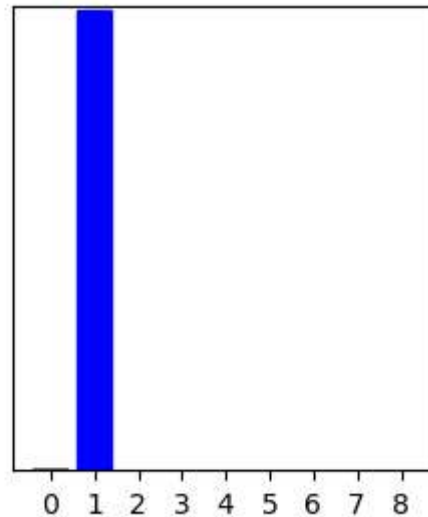

```
In [55]: predicted_classes = model.predict(x=test_batches, steps=len(test_batches), verbose=0)
predicted_classes = np.argmax(np.round(predicted_classes),axis=1)
predicted_classes.shape, y_pred.shape
#print(type(predictions), predictions.shape)
```

```
Out[55]: ((360,), (360,))
```

```
In [56]: plt.figure(figsize=(10, 10))
correct = np.where(predicted_classes==y_pred)[0]
print ("Found %d correct labels" % len(correct))
for i, correct in enumerate(correct[:9]):
    plt.subplot(3,3,i+1)
    plt.imshow(testX[correct], cmap='gray', interpolation='none')
```

```
plt.title("Predicted {}, Class {}".format(predicted_classes[correct], y_pred[correct]))  
plt.tight_layout()
```

Clipping input data to the valid range for imshow with RGB data ([0..1] for floats or [0..255] for integers).

Clipping input data to the valid range for imshow with RGB data ([0..1] for floats or [0..255] for integers).

Clipping input data to the valid range for imshow with RGB data ([0..1] for floats or [0..255] for integers).

Found 356 correct labels

Clipping input data to the valid range for imshow with RGB data ([0..1] for floats or [0..255] for integers).

Clipping input data to the valid range for imshow with RGB data ([0..1] for floats or [0..255] for integers).

Clipping input data to the valid range for imshow with RGB data ([0..1] for floats or [0..255] for integers).

Clipping input data to the valid range for imshow with RGB data ([0..1] for floats or [0..255] for integers).

Clipping input data to the valid range for imshow with RGB data ([0..1] for floats or [0..255] for integers).

Clipping input data to the valid range for imshow with RGB data ([0..1] for floats or [0..255] for integers).

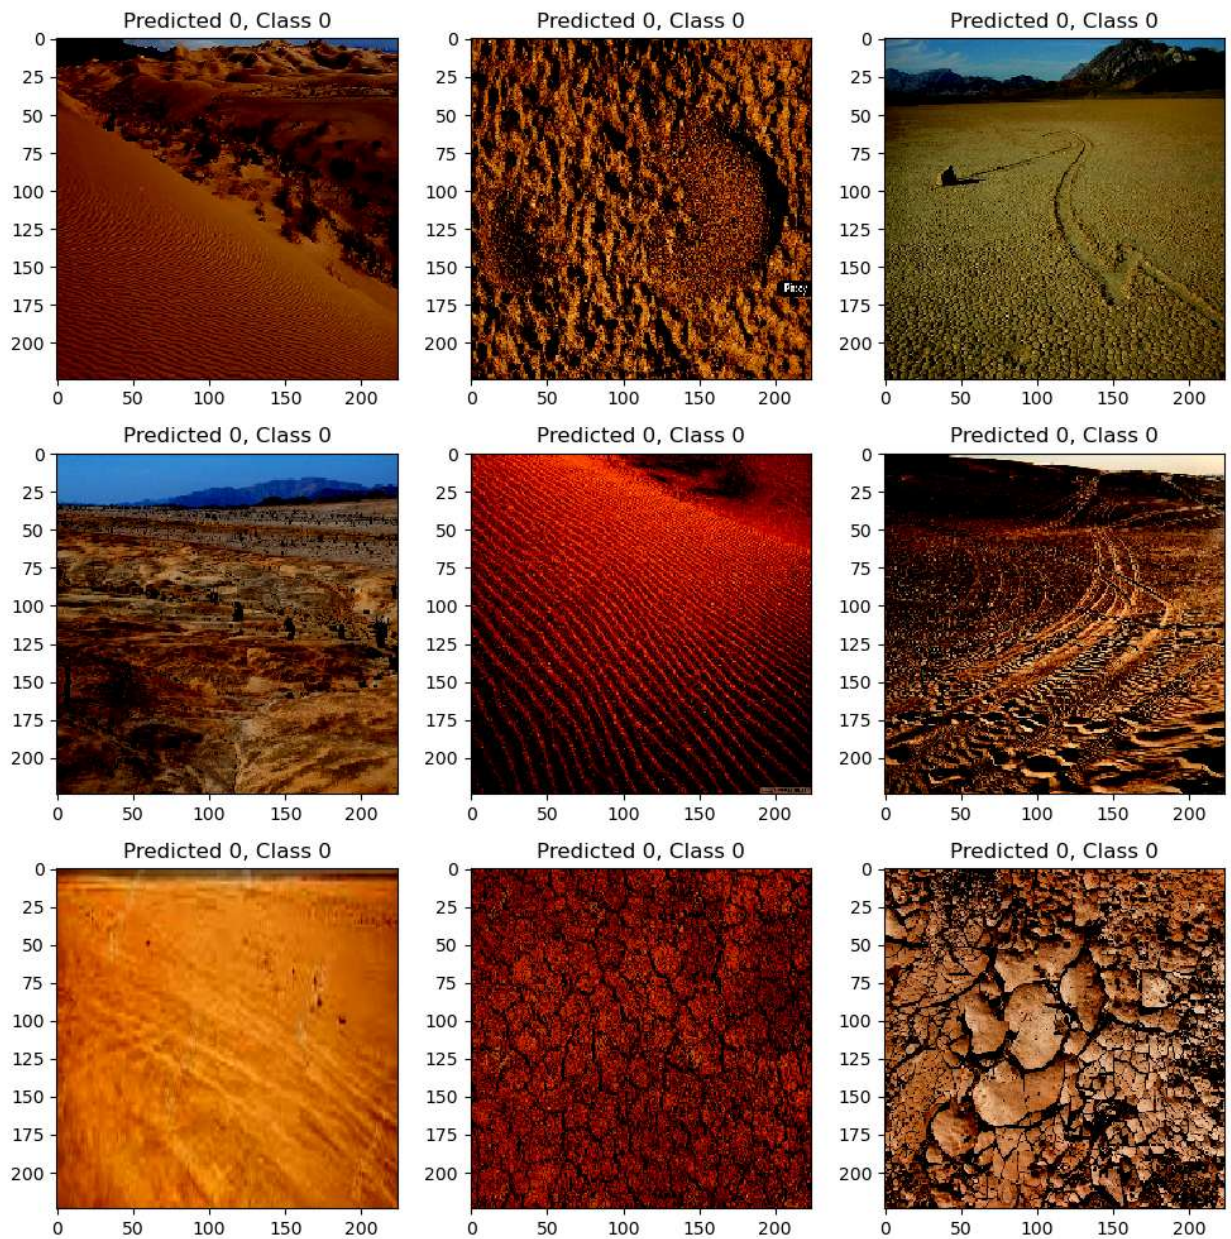

In [57]: *#printing the first element from predicted data*

```
pred=model.predict(test_batches)
print(pred[0])
#printing the index of
print('Index:',np.argmax(pred[0]))
```

```
1/1 [=====] - 8s 8s/step
[9.9995685e-01 4.0995194e-05 3.4780383e-11 1.6994706e-10 4.2968244e-07
 2.1204208e-07 1.3828437e-06 2.1488546e-08 3.5806274e-08]
Index: 0
```

In [58]: `predictions = model.predict(test_batches)`

```
for i in range(len(test_batches)):
    print("X=%s, Predicted=%s" % (test_batches[i], predictions[i]))
```

```

1/1 [=====] - 9s 9s/step
X=(array([[[-0.5764706 , -0.5372549 , -0.38039213],
          [-0.5294118 , -0.4823529 , -0.32549018],
          [-0.45098037, -0.3960784 , -0.25490195],
          ...,
          [ 0.19215691,  0.34901965,  0.56078434],
          [ 0.19215691,  0.34901965,  0.56078434],
          [ 0.19215691,  0.34901965,  0.56078434]],

          [[-0.62352943, -0.58431375, -0.42745095],
          [-0.6156863 , -0.56078434, -0.41176468],
          [-0.6627451 , -0.60784316, -0.46666664],
          ...,
          [ 0.18431377,  0.3411765 ,  0.5529412 ],
          [ 0.19215691,  0.34901965,  0.56078434],
          [ 0.19215691,  0.34901965,  0.56078434]],

          [[-0.62352943, -0.58431375, -0.4352941 ],
          [-0.654902 , -0.60784316, -0.4588235 ],
          [-0.7019608 , -0.64705884, -0.5058824 ],
          ...,
          [ 0.18431377,  0.3411765 ,  0.5529412 ],
          [ 0.18431377,  0.3411765 ,  0.5529412 ],
          [ 0.19215691,  0.34901965,  0.56078434]],

          ...,

          [[ 0.27843142, -0.05882353, -0.3333333 ],
          [ 0.24705887, -0.09019607, -0.36470586],
          [ 0.21568632, -0.12156862, -0.3960784 ],
          ...,
          [ 0.46666667 ,  0.16078436, -0.08235294],
          [ 0.3803922 ,  0.07450986, -0.16862744],
          [ 0.4039216 ,  0.09019613, -0.14509803]],

          [[ 0.38823533,  0.05098045, -0.2235294 ],
          [ 0.38823533,  0.05098045, -0.2235294 ],
          [ 0.3411765 ,  0.01176476, -0.26274508],
          ...,
          [ 0.28627455, -0.01960784, -0.26274508],
          [ 0.4431373 ,  0.13725495, -0.10588235],
          [ 0.41960788,  0.11372554, -0.12941176]],

          [[ 0.33333337,  0.00392163, -0.27058822],
          [ 0.36470592,  0.02745104, -0.24705881],
          [ 0.37254906,  0.03529418, -0.23921567],
          ...,
          [ 0.427451 ,  0.12156868, -0.12156862],
          [ 0.3803922 ,  0.07450986, -0.16862744],
          [ 0.34901965,  0.04313731, -0.19999999]]],

          [[[ 0.24705887, -0.08235294, -0.38039213],
          [ 0.38823533,  0.05882359, -0.23921567],
          [ 0.35686278,  0.05098045, -0.35686272],
          ...,
          [ 0.48235297,  0.13725495, -0.23137254],
          [ 0.5921569 ,  0.24705887, -0.10588235],
          [ 0.37254906,  0.02745104, -0.32549018]]],

```

```

[[ 0.45098042, 0.12941182, -0.20784312],
 [ 0.26274514, -0.05882353, -0.3960784 ],
 [ 0.6627451 , 0.3411765 , -0.01960784],
 ...,
 [ 0.47450984, 0.12941182, -0.23921567],
 [ 0.6 , 0.254902 , -0.09803921],
 [ 0.37254906, 0.02745104, -0.32549018]],

[[ 0.21568632, -0.09803921, -0.47450978],
 [ 0.2941177 , -0.01960784, -0.40392154],
 [ 0.54509807, 0.21568632, -0.11372548],
 ...,
 [ 0.4666667 , 0.12156868, -0.24705881],
 [ 0.41960788, 0.07450986, -0.27843136],
 [ 0.56078434, 0.21568632, -0.1372549 ]],

...,

[[ 0.26274514, -0.05882353, -0.38823527],
 [ 0.26274514, -0.06666666, -0.35686272],
 [ 0.28627455, 0.02745104, -0.38823527],
 ...,
 [ 0.4666667 , 0.12156868, -0.26274508],
 [ 0.654902 , 0.33333337, -0.02745098],
 [ 0.67058825, 0.34901965, -0.01176471]],

[[ -0.34117645, -0.60784316, -0.827451 ],
 [ -0.27058822, -0.5529412 , -0.7254902 ],
 [ -0.26274508, -0.4823529 , -0.70980394],
 ...,
 [ 0.69411767, 0.34901965, -0.03529412],
 [ 0.4901961 , 0.1686275 , -0.19215685],
 [ 0.4666667 , 0.14509809, -0.21568626]],

[[ -0.3098039 , -0.5137255 , -0.75686276],
 [ -0.3490196 , -0.5529412 , -0.75686276],
 [ -0.44313723, -0.60784316, -0.77254903],
 ...,
 [ 0.6313726 , 0.28627455, -0.09803921],
 [ 0.5921569 , 0.27058828, -0.09019607],
 [ 0.5372549 , 0.21568632, -0.14509803]]],

[[[ 0.11372554, 0.37254906, 0.5058824 ],
 [ 0.12156868, 0.3803922 , 0.5294118 ],
 [ 0.14509809, 0.38823533, 0.5529412 ],
 ...,
 [ 0.04313731, 0.38823533, 0.5921569 ],
 [ 0.06666672, 0.35686278, 0.5686275 ],
 [ 0.06666672, 0.36470592, 0.5764706 ]],

[[ 0.12941182, 0.3803922 , 0.52156866],
 [ 0.15294123, 0.38823533, 0.5294118 ],
 [ 0.1686275 , 0.3803922 , 0.5294118 ],
 ...,
 [ 0.05882359, 0.4039216 , 0.6 ],
 [ 0.07450986, 0.38823533, 0.5921569 ],
 [ 0.06666672, 0.3803922 , 0.58431375]],

[[ 0.16078436, 0.3803922 , 0.52156866],

```

```

[ 0.18431377, 0.3803922 , 0.5137255 ],
[ 0.21568632, 0.3803922 , 0.52156866],
...,
[ 0.082353 , 0.4039216 , 0.6 ],
[ 0.07450986, 0.38823533, 0.58431375],
[ 0.082353 , 0.39607847, 0.5921569 ]],

...,

[[ 0.41960788, 0.3803922 , 0.06666672],
 [ 0.04313731, -0.00392157, -0.29411763],
 [ 0.10588241, 0.082353 , -0.17647058],
 ...,
 [-0.01176471, -0.04313725, -0.16862744],
 [ 0.07450986, 0.00392163, -0.2235294 ],
 [ 0.30980396, 0.21568632, -0.09019607]],

[[ 0.4039216 , 0.36470592, 0.06666672],
 [-0.1372549 , -0.18431371, -0.45098037],
 [ 0.23921573, 0.20784318, -0.01176471],
 ...,
 [ 0.06666672, -0.01960784, -0.21568626],
 [ 0.16078436, 0.082353 , -0.19999999],
 [ 0.32549024, 0.22352946, -0.11372548]],

[[ 0.24705887, 0.17647064, -0.1607843 ],
 [ 0.2313726 , 0.17647064, -0.04313725],
 [ 0.082353 , 0.082353 , -0.25490195],
 ...,
 [ 0.04313731, -0.01960784, -0.19999999],
 [ 0.32549024, 0.26274514, -0.12156862],
 [ 0.3803922 , 0.2941177 , -0.0745098 ]]],

...,

[[[ 0.5294118 , 0.1686275 , -0.5058824 ],
 [ 0.5058824 , 0.14509809, -0.5294118 ],
 [ 0.45882356, 0.09803927, -0.5764706 ],
 ...,
 [ 0.5294118 , 0.22352946, -0.21568626],
 [ 0.47450984, 0.14509809, -0.3333333 ],
 [ 0.38823533, 0.03529418, -0.49019605]],

[[ 0.41176474, 0.05098045, -0.62352943],
 [ 0.43529415, 0.07450986, -0.5921569 ],
 [ 0.45098042, 0.09019613, -0.5764706 ],
 ...,
 [ 0.4666667 , 0.16078436, -0.2862745 ],
 [ 0.45098042, 0.12156868, -0.36470586],
 [ 0.37254906, 0.0196079 , -0.5058824 ]],

[[ 0.22352946, -0.1372549 , -0.8039216 ],
 [ 0.33333337, -0.02745098, -0.69411767],
 [ 0.43529415, 0.07450986, -0.58431375],
 ...,
 [ 0.36470592, 0.05098045, -0.3960784 ],
 [ 0.41960788, 0.082353 , -0.41176468],
 [ 0.34901965, -0.00392157, -0.5372549 ]],

```

```

...,
[[ 0.23921573, -0.27843136, -0.9372549 ],
 [ 0.254902 , -0.26274508, -0.92156863],
 [ 0.33333337, -0.18431371, -0.84313726],
 ...,
 [ 0.6313726 , 0.12156868, -0.6 ],
 [ 0.6392157 , 0.12941182, -0.6 ],
 [ 0.64705884, 0.12941182, -0.60784316]],

[[ 0.2313726 , -0.2862745 , -0.94509804],
 [ 0.254902 , -0.26274508, -0.92156863],
 [ 0.3411765 , -0.17647058, -0.84313726],
 ...,
 [ 0.62352943, 0.11372554, -0.60784316],
 [ 0.62352943, 0.11372554, -0.6156863 ],
 [ 0.62352943, 0.10588241, -0.6313726 ]],

[[ 0.22352946, -0.29411763, -0.9529412 ],
 [ 0.26274514, -0.26274508, -0.92156863],
 [ 0.3411765 , -0.17647058, -0.84313726],
 ...,
 [ 0.6156863 , 0.10588241, -0.6156863 ],
 [ 0.6156863 , 0.09803927, -0.62352943],
 [ 0.6156863 , 0.09803927, -0.6392157 ]]],

[[[ 0.52156866, 0.827451 , 0.94509804],
 [ 0.52156866, 0.827451 , 0.94509804],
 [ 0.52156866, 0.827451 , 0.94509804],
 ...,
 [ 0.6862745 , 0.92156863, 0.92156863],
 [ 0.6392157 , 0.92156863, 0.90588236],
 [ 0.6392157 , 0.92156863, 0.90588236]],

[[ 0.5137255 , 0.827451 , 0.94509804],
 [ 0.5137255 , 0.827451 , 0.94509804],
 [ 0.5137255 , 0.827451 , 0.94509804],
 ...,
 [ 0.6784314 , 0.9137255 , 0.9137255 ],
 [ 0.6392157 , 0.92156863, 0.90588236],
 [ 0.6392157 , 0.92156863, 0.90588236]],

[[ 0.49803925, 0.81960785, 0.9372549 ],
 [ 0.49803925, 0.81960785, 0.9372549 ],
 [ 0.49803925, 0.81960785, 0.9372549 ],
 ...,
 [ 0.6627451 , 0.90588236, 0.90588236],
 [ 0.6313726 , 0.9137255 , 0.8980392 ],
 [ 0.6313726 , 0.9137255 , 0.8980392 ]],

...,

[[ -0.38823527, -0.7019608 , -0.8352941 ],
 [ 0.082353 , -0.20784312, -0.5058824 ],
 [ -0.1372549 , -0.40392154, -0.7176471 ],
 ...,
 [ 0.5921569 , 0.254902 , -0.3333333 ],
 [ 0.41176474, 0.12156868, -0.42745095],

```

```

[ 0.35686278, 0.05882359, -0.49019605]],

[[-0.14509803, -0.4588235 , -0.69411767],
 [ 0.13725495, -0.1607843 , -0.45098037],
 [-0.12941176, -0.40392154, -0.70980394],
 ...,
 [ 0.654902 , 0.3176471 , -0.26274508],
 [ 0.47450984, 0.18431377, -0.36470586],
 [ 0.41960788, 0.12941182, -0.41960782]],

[[-0.04313725, -0.3490196 , -0.6392157 ],
 [ 0.16078436, -0.1372549 , -0.42745095],
 [-0.12941176, -0.40392154, -0.70980394],
 ...,
 [ 0.6862745 , 0.34901965, -0.23137254],
 [ 0.49803925, 0.20784318, -0.34117645],
 [ 0.4431373 , 0.15294123, -0.3960784 ]]],

[[[ 0.69411767, 0.05098045, -1.          ],
 [ 0.8666667 , 0.22352946, -0.85882354],
 [ 0.7176471 , 0.082353 , -1.          ],
 ...,
 [ 0.8980392 , 0.27843142, -0.7176471 ],
 [ 0.7882353 , 0.1686275 , -0.827451 ],
 [ 0.6784314 , 0.05098045, -0.81960785]],

[[ 0.7882353 , 0.13725495, -0.8666667 ],
 [ 0.827451 , 0.17647064, -0.85882354],
 [ 0.92156863, 0.27843142, -0.77254903],
 ...,
 [ 0.7490196 , 0.12941182, -0.8980392 ],
 [ 0.85882354, 0.23921573, -0.77254903],
 [ 0.6156863 , -0.01176471, -0.8980392 ]]],

[[ 0.7176471 , 0.05098045, -0.8666667 ],
 [ 0.79607844, 0.12941182, -0.8039216 ],
 [ 0.6784314 , 0.0196079 , -0.9607843 ],
 ...,
 [ 0.6862745 , 0.07450986, -0.99215686],
 [ 0.8745098 , 0.26274514, -0.8039216 ],
 [ 0.7254902 , 0.09019613, -0.8352941 ]]],

...,

[[ 0.69411767, 0.0196079 , -0.9137255 ],
 [ 0.5921569 , -0.08235294, -1.          ],
 [ 0.79607844, 0.12156868, -0.8117647 ],
 ...,
 [ 0.54509807, -0.1607843 , -0.75686276],
 [ 0.56078434, -0.15294117, -0.7254902 ],
 [ 0.41960788, -0.3333333 , -0.8117647 ]]],

[[ 0.54509807, -0.1372549 , -1.          ],
 [ 0.38823533, -0.29411763, -1.          ],
 [ 0.64705884, -0.03529412, -0.94509804],
 ...,
 [ 0.27058828, -0.45098037, -0.9764706 ],
 [ 0.15294123, -0.5686275 , -1.          ],
 [ 0.20000005, -0.5529412 , -1.          ]]],

```

```
[[ 0.5058824 , -0.1607843 , -0.8666667 ],
 [ 0.654902 , -0.00392157, -0.77254903],
 [ 0.67058825,  0.00392163, -0.8509804 ],
 ...,
 [ 0.5058824 , -0.18431371, -0.8901961 ],
 [ 0.5686275 , -0.12156862, -0.8039216 ],
 [ 0.39607847, -0.27058822, -0.90588236]]], dtype=float32), array([[1., 0.,
0., ..., 0., 0., 0.],
 [1., 0., 0., ..., 0., 0., 0.],
 [1., 0., 0., ..., 0., 0., 0.],
 ...,
 [0., 0., 0., ..., 0., 0., 1.],
 [0., 0., 0., ..., 0., 0., 1.],
 [0., 0., 0., ..., 0., 0., 1.]], dtype=float32)), Predicted=[9.9995685e-01 4.09
95194e-05 3.4780383e-11 1.6994706e-10 4.2968244e-07
2.1204208e-07 1.3828437e-06 2.1488546e-08 3.5806274e-08]
```

```
In [59]: y_classes = [np.argmax(element) for element in pred]
print('Predicted_values:',pred[:360])
print('Actual values:',y_pred[:360])
```

[illegible]

```
In [60]: predicted_classes = model.predict(x=test_batches, steps=len(test_batches), verbose=0)
predicted_classes = np.argmax(np.round(predicted_classes),axis=1)
predicted_classes.shape, y_pred.shape
#print(type(predictions), predictions.shape)
```

```
Out[60]: ((360,), (360,))
```

```
In [61]: plt.figure(figsize=(10, 10))
incorrect = np.where(predicted_classes!=y_pred)[0]
print(("Found %d incorrect labels") % len(incorrect))
for i, incorrect in enumerate(incorrect[:0]):
    plt.subplot(3,3,i+1)
    plt.imshow(testX[incorrect], cmap='gray', interpolation='none')
```

```
plt.title("Predicted {}, Class {}".format(predicted_classes[incorrect], y_pred[incorrect]))  
plt.tight_layout()
```

Found 4 incorrect labels

<Figure size 1000x1000 with 0 Axes>

```
In [62]: y_classes = [np.argmax(element) for element in pred]  
print('Predicted_values:',pred[:50])  
print('Actual_values:',y_pred[:50])
```

```
Predicted_values: [[9.99956846e-01 4.09951936e-05 3.47803834e-11 1.69947056e-10
4.29682444e-07 2.12042082e-07 1.38284372e-06 2.14885461e-08
3.58062735e-08]
[9.34629679e-01 1.45348883e-03 6.38237589e-06 9.53435233e-07
6.35011602e-05 3.17888007e-05 3.19291130e-02 5.85181988e-05
3.18264477e-02]
[1.00000000e+00 9.44425249e-09 1.29104355e-12 4.92525779e-13
3.70910369e-09 6.60354271e-10 3.31885053e-09 4.86678209e-09
3.00764502e-09]
[9.99995232e-01 3.14334739e-06 5.70018546e-11 1.29813771e-10
4.57651446e-08 8.39929157e-07 9.38477118e-09 3.37945238e-07
5.29958584e-07]
[9.99933958e-01 2.00049999e-06 2.72260392e-09 2.03705373e-08
3.16066391e-08 8.73086847e-08 6.36146069e-05 8.96800358e-08
2.59178762e-07]
[9.99991059e-01 2.61138644e-06 2.33291747e-10 1.70506631e-08
3.93569508e-07 2.79137424e-07 5.51875974e-06 1.48729873e-08
7.45667705e-08]
[9.99999762e-01 1.86872184e-09 1.05960232e-11 2.12134185e-10
4.07364666e-08 4.08446471e-10 1.09717121e-07 2.23961170e-08
6.96811497e-08]
[9.99982595e-01 2.11797619e-08 1.64629625e-06 1.09406592e-07
5.39684919e-08 3.92586870e-08 9.12795258e-06 6.11808036e-06
3.38062819e-07]
[9.99963999e-01 6.26305609e-06 3.49671136e-09 4.31736822e-07
2.23750035e-07 1.47858532e-06 1.40970651e-05 6.89102762e-07
1.28602987e-05]
[9.99966662e-01 3.67172914e-09 2.86886118e-12 1.90576199e-09
2.34464270e-08 1.89300997e-09 6.47214620e-07 2.39902676e-08
2.78392076e-06]
[9.99968410e-01 7.49243418e-06 7.56571623e-08 1.41531435e-08
1.47540140e-06 1.03658713e-05 1.59304363e-06 1.02927388e-05
3.43919453e-07]
[9.97479618e-01 9.61884798e-05 4.50889318e-04 1.10151457e-04
2.19028170e-05 4.18388314e-04 3.39262566e-04 8.41597328e-04
2.42019232e-04]
[9.99954581e-01 5.17232411e-06 7.34832507e-12 1.48643778e-10
7.35090634e-06 2.65077290e-07 2.96197741e-05 2.89277978e-06
1.54670289e-07]
[9.99908686e-01 3.68831650e-08 5.53356874e-11 1.63019223e-10
1.92566176e-08 2.73252496e-08 4.52347166e-07 8.92868920e-05
1.44075705e-06]
[9.86257792e-01 1.16822928e-04 1.33363316e-02 3.80997585e-06
1.39306969e-04 1.19440345e-04 1.84739911e-05 5.57936210e-06
2.46803779e-06]
[1.00000000e+00 6.85753815e-11 5.69274987e-14 8.92487148e-13
2.12353156e-11 9.42594058e-11 1.88664706e-09 5.37641737e-11
2.80650156e-11]
[9.97898102e-01 1.62461679e-03 6.01992767e-09 9.22280492e-08
3.08843970e-04 1.61243606e-05 1.51552580e-04 4.46829688e-07
2.94001580e-07]
[9.98316407e-01 1.34566616e-08 5.53239721e-09 1.28837359e-08
7.47221378e-08 2.44530147e-05 1.61583330e-06 1.39029312e-03
2.67035444e-04]
[9.99992847e-01 1.39876576e-07 1.45789392e-09 2.07683715e-09
8.30873930e-08 3.53382347e-07 6.26216732e-08 4.16445118e-06
2.31096442e-06]
[1.00000000e+00 8.27745961e-09 3.54237798e-13 2.74894517e-11
3.29584277e-10 3.58751535e-08 1.69435632e-09 4.66548977e-09
3.57579077e-09]
```

[1.00000000e+00 3.96965620e-11 2.68847271e-12 9.33517066e-12  
1.56665514e-10 3.25350025e-11 2.39189344e-08 5.74279735e-10  
2.09660134e-09]  
[9.99984860e-01 1.55514560e-10 4.41499224e-12 1.07859534e-10  
1.33860718e-08 5.06907973e-08 2.70634558e-07 6.40802682e-08  
1.47835171e-05]  
[9.99995708e-01 9.20406720e-12 1.72629207e-12 1.08696446e-11  
7.27253413e-09 2.59515909e-10 4.34432968e-06 1.57756154e-12  
2.86395185e-10]  
[9.99351203e-01 3.37724690e-04 3.62091157e-07 2.20261626e-07  
3.21319760e-07 3.21736508e-07 1.69146751e-05 2.25149142e-05  
2.70427641e-04]  
[9.94664073e-01 7.03027690e-05 3.47296492e-07 5.02449438e-07  
4.95631248e-03 1.72515847e-05 2.31657905e-04 4.75885172e-05  
1.18273974e-05]  
[9.97442722e-01 7.11952162e-05 1.20589484e-05 3.13745386e-06  
1.11170239e-05 8.19152956e-06 1.04830635e-03 5.32229722e-04  
8.71059601e-04]  
[9.05163586e-01 5.36845298e-04 6.12017029e-05 6.38434649e-05  
7.84907315e-04 4.26206789e-05 3.12178694e-02 2.49669584e-03  
5.96324615e-02]  
[9.9999523e-01 5.22579369e-10 2.07656756e-11 7.16812200e-12  
2.33751720e-07 4.73847050e-09 3.06670644e-09 1.52424050e-07  
1.35779260e-07]  
[4.96408865e-02 3.09819416e-06 2.31210997e-08 2.46599302e-06  
2.49069097e-04 6.04166075e-07 5.88236034e-01 6.74992989e-05  
3.61800343e-01]  
[7.00945973e-01 1.50751206e-04 1.17035692e-04 5.17393164e-02  
1.60490497e-04 1.52967721e-01 1.02653685e-04 9.37152505e-02  
1.00852878e-04]  
[9.9999762e-01 8.86260954e-10 1.12496824e-13 5.90179964e-14  
4.36423733e-08 5.15098186e-10 1.58605729e-07 3.66007585e-10  
1.57823251e-07]  
[9.9999285e-01 5.57694051e-08 4.49224075e-10 4.95399295e-12  
7.58669998e-08 8.88712606e-08 5.16936964e-08 6.14247995e-08  
4.12636950e-07]  
[7.90441811e-01 3.69166606e-04 1.11532779e-06 4.00363263e-07  
2.08869874e-01 3.42257681e-06 2.82808760e-04 1.90309868e-06  
2.94868041e-05]  
[1.00000000e+00 2.47724535e-10 3.23366279e-13 7.83502013e-11  
5.92870752e-11 5.66228897e-10 7.66518760e-09 4.54537341e-09  
5.49694423e-09]  
[9.99983072e-01 4.89739378e-08 7.78593075e-12 1.71179841e-11  
1.05758080e-09 3.75662211e-07 1.62515530e-08 1.38871828e-05  
2.61805826e-06]  
[9.9999762e-01 5.39254752e-12 6.06633233e-13 7.50499662e-12  
8.98663810e-09 2.07808199e-07 2.05511963e-09 4.16375698e-08  
3.65687458e-09]  
[9.9996662e-01 9.66695893e-07 1.12464246e-10 7.86097992e-11  
9.27976629e-09 2.00589443e-06 6.14021101e-09 2.51598266e-07  
6.68605935e-08]  
[9.99982357e-01 1.76816840e-07 8.16678170e-10 4.37545083e-10  
7.70549548e-07 1.53061937e-05 1.42835759e-07 3.38317847e-07  
9.82092388e-07]  
[9.99992728e-01 1.85070803e-08 6.41278142e-09 5.25295263e-07  
1.82661125e-07 4.61368609e-06 4.23797161e-07 1.32387436e-06  
1.39789321e-07]  
[1.77145272e-01 8.18032920e-01 1.34696253e-04 2.56346411e-05  
5.48509306e-05 4.09874320e-03 2.78097723e-05 4.74880682e-04  
5.14588510e-06]

```
[6.66871294e-02 9.26446319e-01 3.92270420e-04 2.63626771e-05  
7.54206048e-05 2.90110765e-04 4.88340249e-03 7.76289671e-05  
1.12133729e-03]  
[3.44083505e-03 9.85637248e-01 3.65189742e-03 9.34631430e-07  
6.67651111e-05 7.14050094e-03 2.19395170e-05 3.69493755e-05  
2.90340108e-06]  
[8.69206906e-06 9.99294043e-01 1.08752101e-04 3.17839124e-08  
8.50591732e-07 5.69906377e-04 3.93862911e-06 1.36493727e-05  
1.29451323e-07]  
[4.12538611e-05 9.97145116e-01 1.87437426e-08 3.40535564e-08  
6.89039226e-08 2.36324011e-03 2.71567643e-07 4.49660060e-04  
3.83317030e-07]  
[1.03244602e-05 9.96215761e-01 3.05517897e-05 5.17586770e-04  
6.83426606e-07 2.64041126e-03 9.69401299e-06 4.55627305e-05  
5.29258745e-04]  
[9.08612634e-08 9.98117208e-01 7.58005946e-04 6.67725590e-06  
8.97464124e-05 7.30774540e-04 2.57731085e-06 5.62083699e-07  
2.94413127e-04]  
[4.39170326e-05 2.14408174e-05 5.40949600e-07 2.56306157e-06  
8.11446853e-07 9.99928951e-01 2.80172998e-07 1.04484184e-06  
4.49740128e-07]  
[1.85514909e-06 9.85593259e-01 1.12292901e-06 1.33397942e-02  
3.40696033e-07 9.25984641e-04 1.74513293e-08 1.37136012e-04  
5.83979670e-07]  
[3.44000146e-04 9.95288372e-01 4.76585910e-07 6.48846708e-06  
1.82410087e-08 4.37941460e-04 1.11072227e-08 3.92078795e-03  
1.90023934e-06]  
[4.27321240e-04 4.38786119e-01 4.97592360e-01 1.23960851e-03  
3.11726399e-05 4.46583815e-02 8.77089678e-06 1.71660967e-02  
9.02614338e-05]]  
Actual_values: [0 0 0 0 0 0 0 0 0 0 0 0 0 0 0 0 0 0 0 0 0 0 0 0 0 0 6 0 0 0 0 0 0  
0 0  
0 0 1 1 1 1 1 1 1 5 1 1 2]
```

```
In [63]: plt.figure()  
plt.imshow(testX[60])  
plt.colorbar()  
plt.show()
```

```
Clipping input data to the valid range for imshow with RGB data ([0..1] for floats or [0..255] for integers).
```

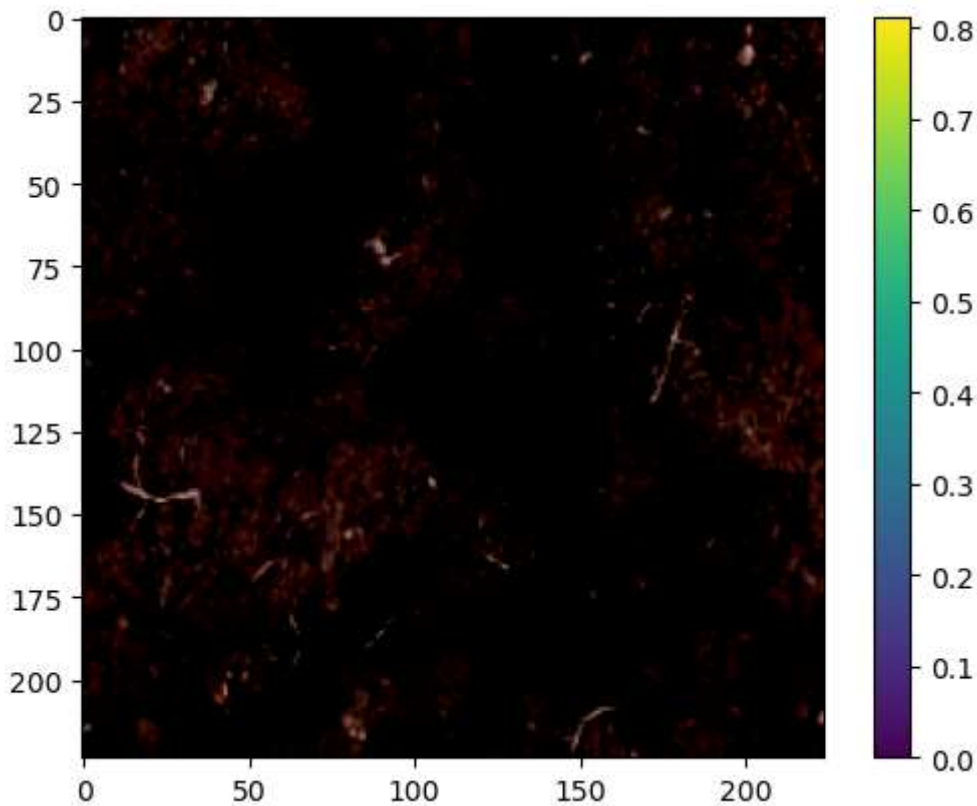

```
In [64]: #printing the first element from predicted data
pred=model.predict(test_batches)
print(pred[60])
#printing the index of
print('Index:', np.argmax(pred[60]))

1/1 [=====] - 9s 9s/step
[3.9867871e-03  9.9434328e-01  1.0524897e-04  1.8053751e-04  4.4848872e-05
  1.0270147e-03  1.4145350e-05  2.9336289e-04  4.8246934e-06]
Index: 1
```

```
In [65]: i=60
plt.figure(figsize=(6,3))
plt.subplot(1,2,1)
plot_image(i, predictions[i], test_labels, testX)
plt.subplot(1,2,2)
plot_value_array(i, predictions[i], test_labels)
plt.show()
```

Clipping input data to the valid range for imshow with RGB data ([0..1] for floats or [0..255] for integers).

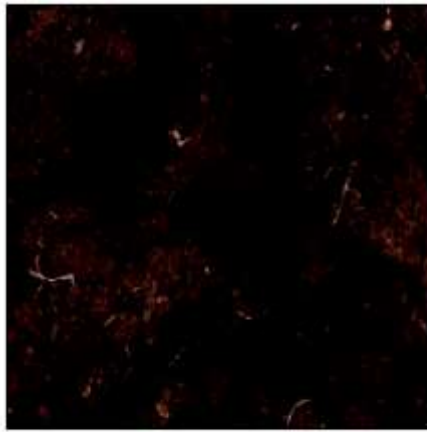

Alluvial 99% (Alluvial)

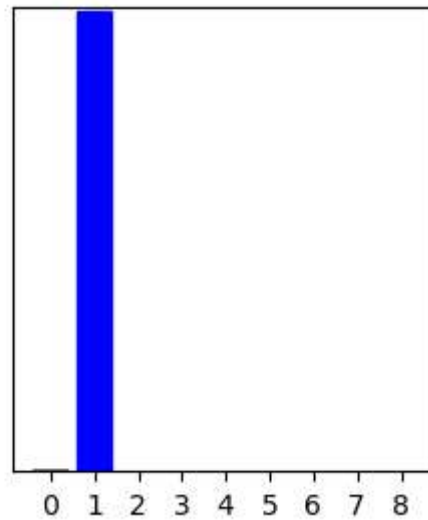

```
In [67]: i=1
plt.figure(figsize=(6,3))
plt.subplot(1,2,1)
plot_image(i, predictions[i], test_labels, testX)
plt.subplot(1,2,2)
plot_value_array(i, predictions[i], test_labels)
plt.show()
```

Clipping input data to the valid range for imshow with RGB data ([0..1] for floats or [0..255] for integers).

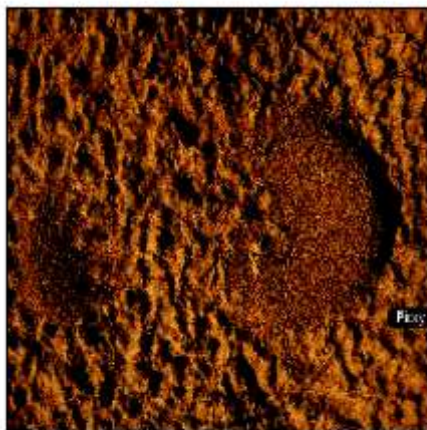

Arid 93% (Arid)

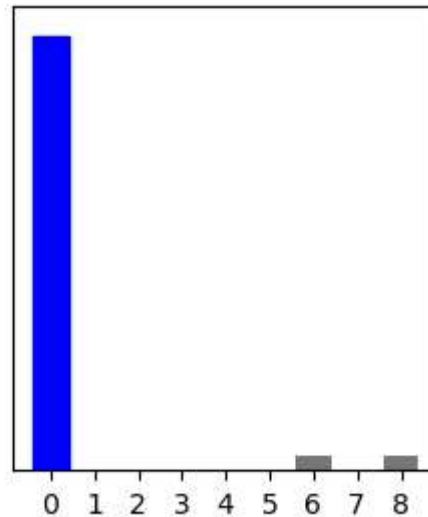

```
In [68]: i=11
plt.figure(figsize=(6,3))
plt.subplot(1,2,1)
plot_image(i, predictions[i], test_labels, testX)
plt.subplot(1,2,2)
plot_value_array(i, predictions[i], test_labels)
plt.show()
```

Clipping input data to the valid range for imshow with RGB data ([0..1] for floats or [0..255] for integers).

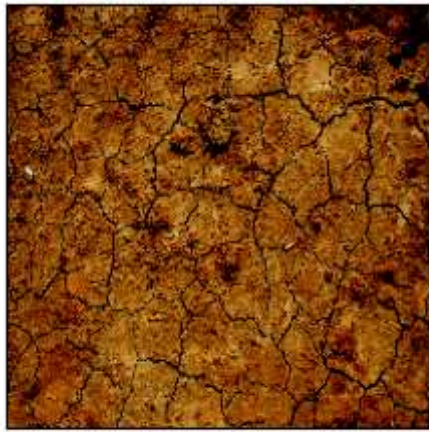

Arid 100% (Arid)

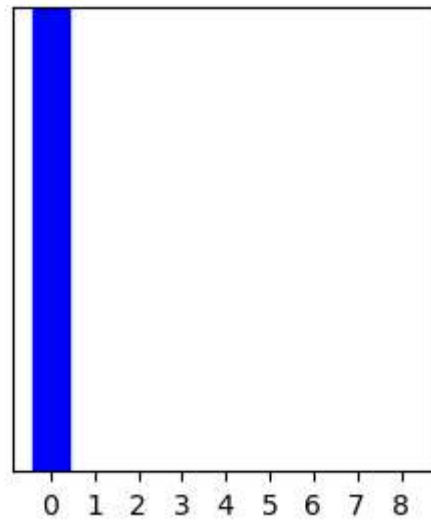

```
In [69]: i=26
plt.figure(figsize=(6,3))
plt.subplot(1,2,1)
plot_image(i, predictions[i], test_labels, testX)
plt.subplot(1,2,2)
plot_value_array(i, predictions[i], test_labels)
plt.show()
```

Clipping input data to the valid range for imshow with RGB data ([0..1] for floats or [0..255] for integers).

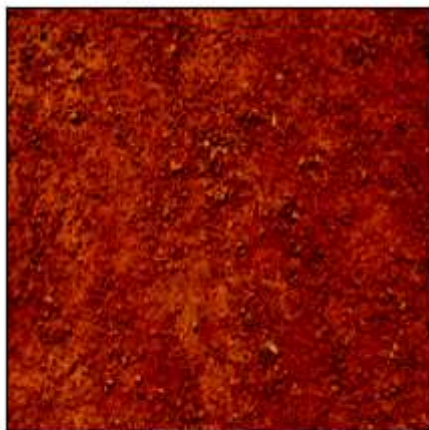

Arid 91% (Arid)

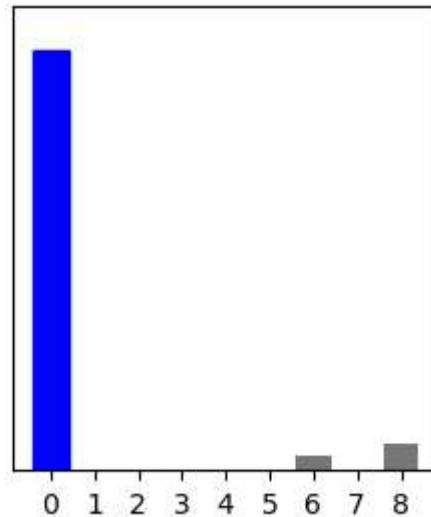

```
In [70]: i=32
plt.figure(figsize=(6,3))
plt.subplot(1,2,1)
plot_image(i, predictions[i], test_labels, testX)
plt.subplot(1,2,2)
plot_value_array(i, predictions[i], test_labels)
plt.show()
```

Clipping input data to the valid range for imshow with RGB data ([0..1] for floats or [0..255] for integers).

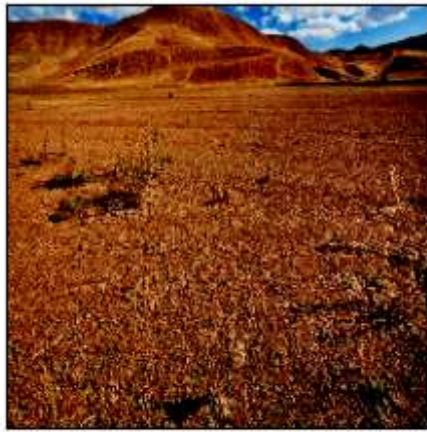

Arid 79% (Arid)

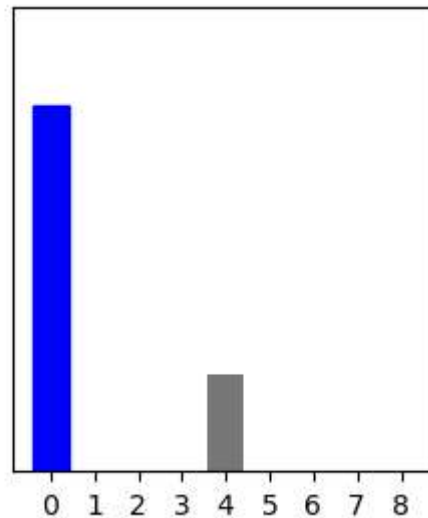

```
In [71]: i=39
plt.figure(figsize=(6,3))
plt.subplot(1,2,1)
plot_image(i, predictions[i], test_labels, testX)
plt.subplot(1,2,2)
plot_value_array(i, predictions[i], test_labels)
plt.show()
```

Clipping input data to the valid range for imshow with RGB data ([0..1] for floats or [0..255] for integers).

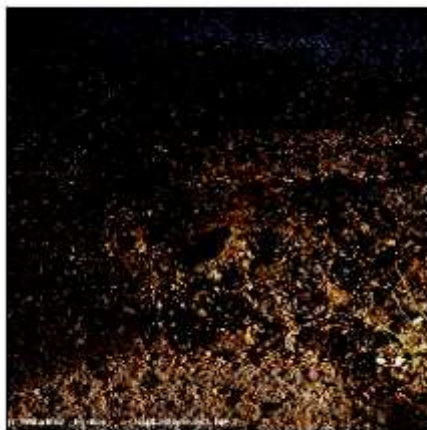

Alluvial 82% (Arid)

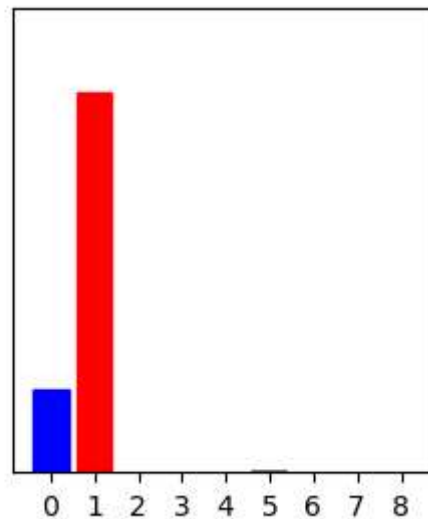

```
In [72]: i=41
plt.figure(figsize=(6,3))
plt.subplot(1,2,1)
plot_image(i, predictions[i], test_labels, testX)
plt.subplot(1,2,2)
plot_value_array(i, predictions[i], test_labels)
plt.show()
```

Clipping input data to the valid range for imshow with RGB data ([0..1] for floats or [0..255] for integers).

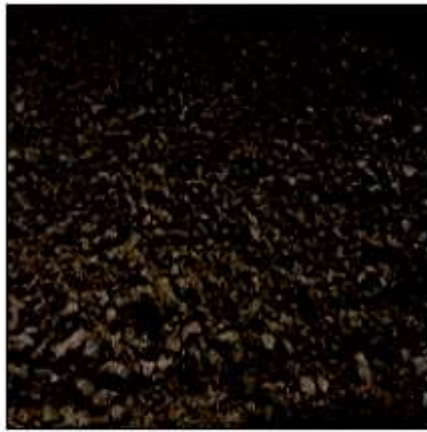

Alluvial 99% (Alluvial)

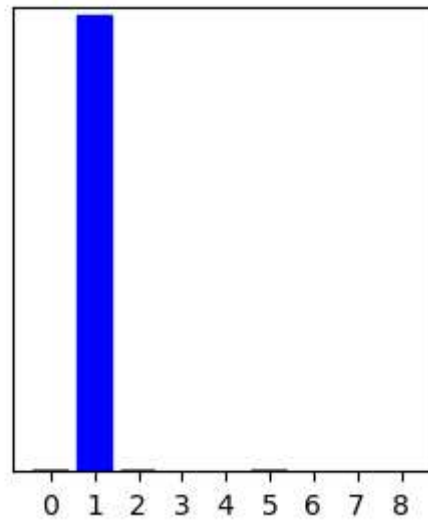

```
In [73]: i=42
plt.figure(figsize=(6,3))
plt.subplot(1,2,1)
plot_image(i, predictions[i], test_labels, testX)
plt.subplot(1,2,2)
plot_value_array(i, predictions[i], test_labels)
plt.show()
```

Clipping input data to the valid range for imshow with RGB data ([0..1] for floats or [0..255] for integers).

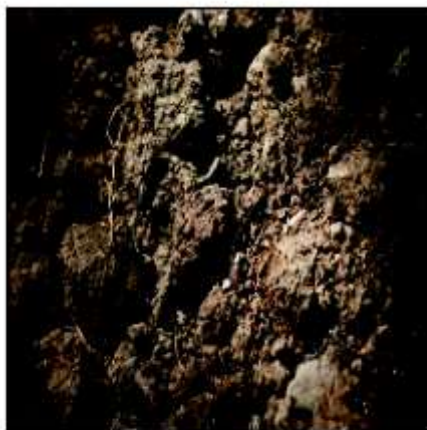

Alluvial 100% (Alluvial)

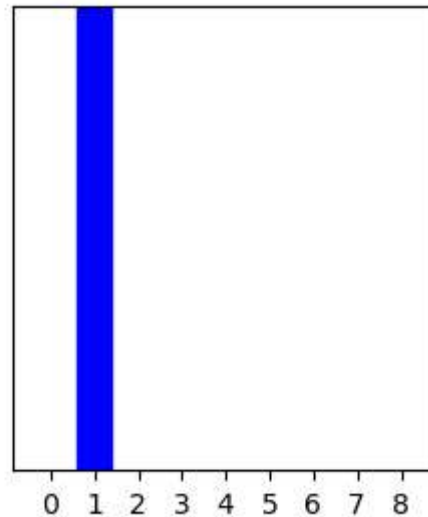

```
In [74]: i=43
plt.figure(figsize=(6,3))
plt.subplot(1,2,1)
plot_image(i, predictions[i], test_labels, testX)
plt.subplot(1,2,2)
plot_value_array(i, predictions[i], test_labels)
plt.show()
```

Clipping input data to the valid range for imshow with RGB data ([0..1] for floats or [0..255] for integers).

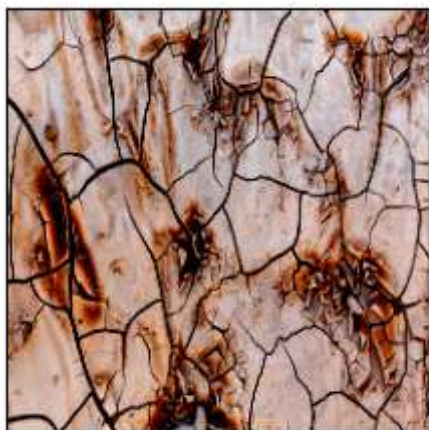

Alluvial 100% (Alluvial)

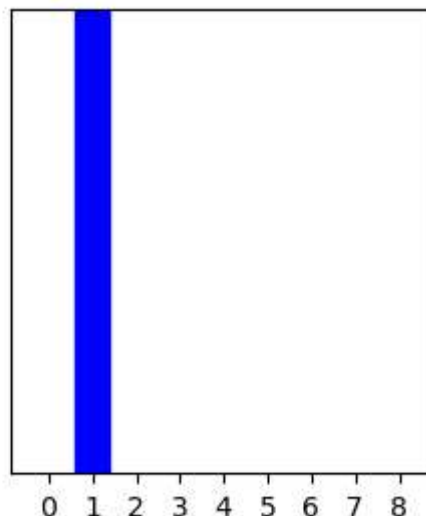

```
In [75]: # plot feature map of first conv layer for given image
from tensorflow.keras.preprocessing.image import load_img
from tensorflow.keras.preprocessing.image import img_to_array
from matplotlib import pyplot
from numpy import expand_dims
# Load the model
model = Model(inputs=model.inputs, outputs=model.layers[1].output)
model.summary()
#model.summary()
# Load the image with the required shape
#img = load_img('C:/Users/GyasiEmmanuelKwabena/Desktop/SOILNET/train/RE/RE_372.png', to
#img = load_img('C:/Users/GyasiEmmanuelKwabena/Desktop/SOILNET/train/AD/AD_309.png', to
#img = load_img('C:/Users/GyasiEmmanuelKwabena/Desktop/SOILNET/train/AL/AL_328.png', to
#img = load_img('C:/Users/GyasiEmmanuelKwabena/Desktop/SOILNET/train/BL/BL_577.png', to
img = load_img('C:/Users/GyasiEmmanuelKwabena/Desktop/SOILNET/train/YE/YE_292.png', tar
# convert the image to an array
img = img_to_array(img)
# expand dimensions so that it represents a single 'sample'
img = expand_dims(img, axis=0)
# prepare the image (e.g. scale pixel values for the vgg)
img = preprocess_input(img)
# get feature map for first hidden layer
feature_maps = model.predict(img)
# plot all 64 maps in an 8x8 squares
square = 4
ix = 1
pyplot.figure(figsize=(224,224))
for _ in range(square):
    for _ in range(square):
        # specify subplot and turn of axis
        ax = pyplot.subplot(square, square, ix)
        ax.set_xticks([])
        ax.set_yticks([])
        # plot filter channel in grayscale
        pyplot.imshow(feature_maps[0, :, :, ix-1], cmap='Set3')
        ix += 1
# show the figure
pyplot.show()
```

Model: "model\_1"

| Layer (type)         | Output Shape            | Param # |
|----------------------|-------------------------|---------|
| input_2 (InputLayer) | [(None, None, None, 3)] | 0       |
| conv1 (Conv2D)       | (None, None, None, 32)  | 864     |

=====  
 Total params: 864  
 Trainable params: 0  
 Non-trainable params: 864

1/1 [=====] - 0s 37ms/step

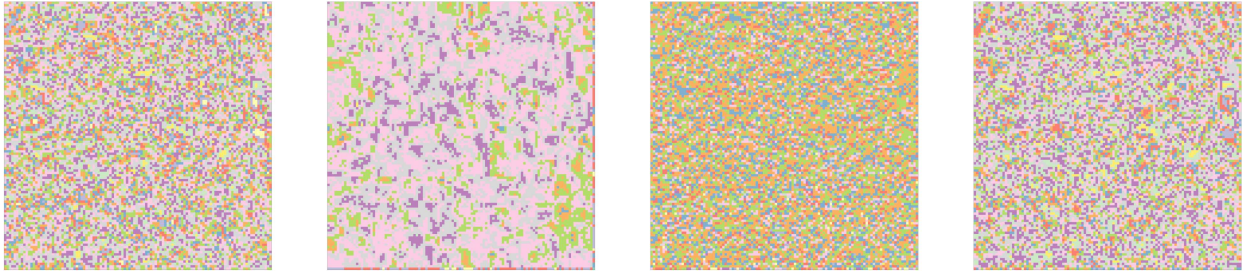

```
In [76]: i=10
plt.figure(figsize=(6,3))
plt.subplot(1,2,1)
plot_image(i, predictions[i], test_labels, testX)
plt.subplot(1,2,2)
plot_value_array(i, predictions[i], test_labels)
plt.show()
```

Clipping input data to the valid range for imshow with RGB data ([0..1] for floats or [0..255] for integers).

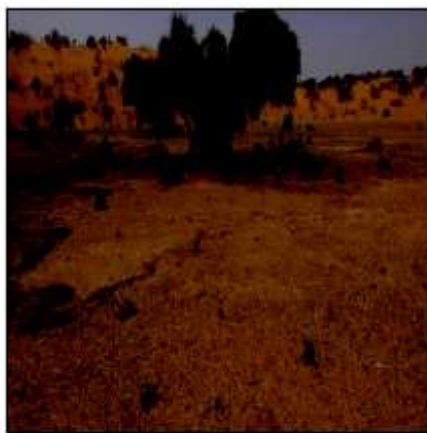

Arid 100% (Arid)

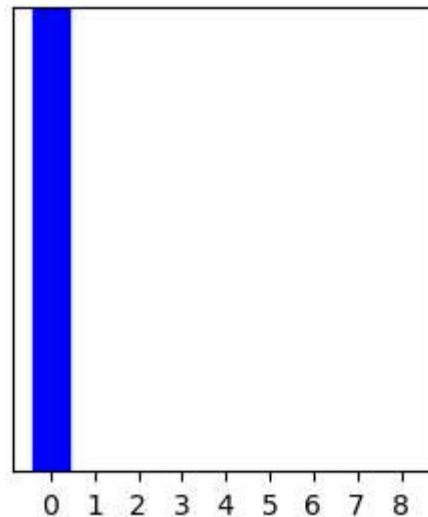

```
In [77]: i=84
plt.figure(figsize=(6,3))
plt.subplot(1,2,1)
plot_image(i, predictions[i], test_labels, testX)
plt.subplot(1,2,2)
plot_value_array(i, predictions[i], test_labels)
plt.show()
```

Clipping input data to the valid range for imshow with RGB data ([0..1] for floats or [0..255] for integers).

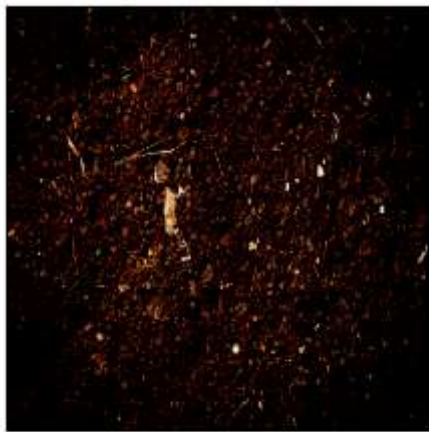

Black 100% (Black)

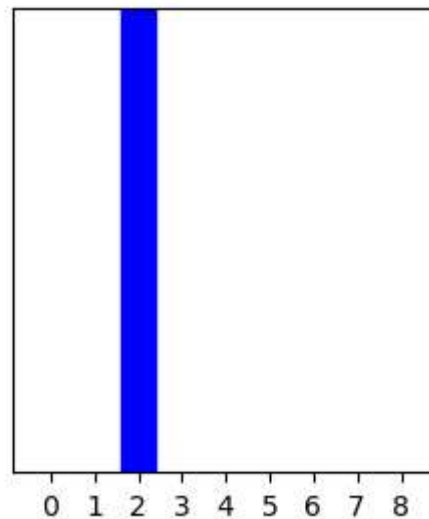

```
In [78]: i=123
plt.figure(figsize=(6,3))
plt.subplot(1,2,1)
plot_image(i, predictions[i], test_labels, testX)
plt.subplot(1,2,2)
plot_value_array(i, predictions[i], test_labels)
plt.show()
```

Clipping input data to the valid range for imshow with RGB data ([0..1] for floats or [0..255] for integers).

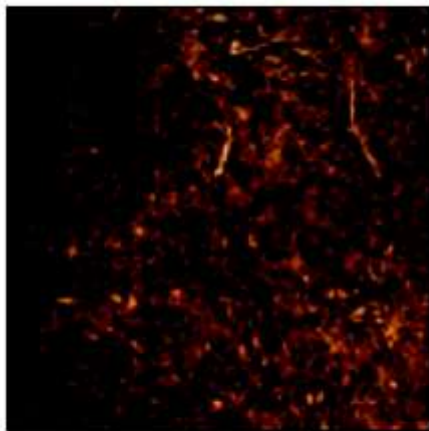

Forest 100% (Forest)

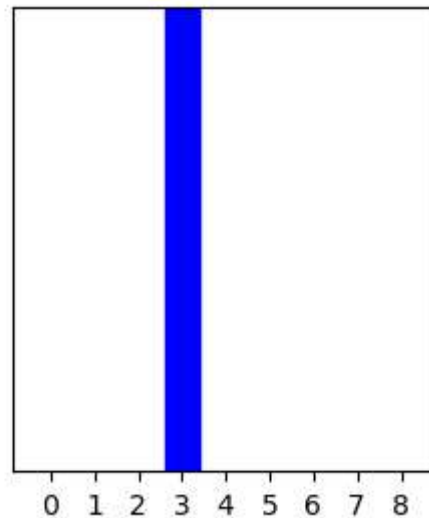

```
In [79]: i=125
plt.figure(figsize=(6,3))
plt.subplot(1,2,1)
plot_image(i, predictions[i], test_labels, testX)
plt.subplot(1,2,2)
plot_value_array(i, predictions[i], test_labels)
plt.show()
```

Clipping input data to the valid range for imshow with RGB data ([0..1] for floats or [0..255] for integers).

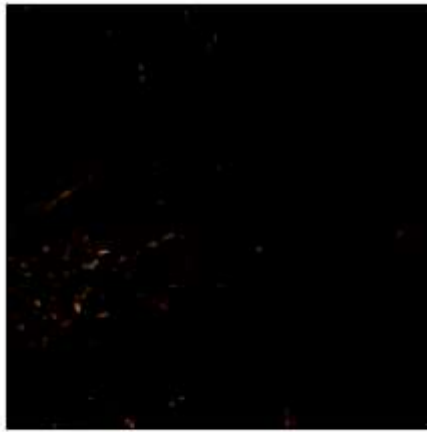

Forest 100% (Forest)

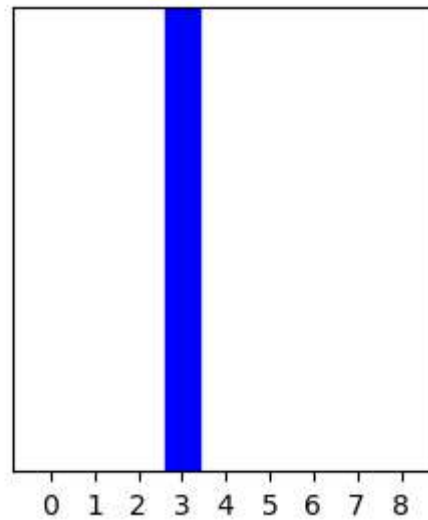

```
In [80]: i=164
plt.figure(figsize=(6,3))
plt.subplot(1,2,1)
plot_image(i, predictions[i], test_labels, testX)
plt.subplot(1,2,2)
plot_value_array(i, predictions[i], test_labels)
plt.show()
```

Clipping input data to the valid range for imshow with RGB data ([0..1] for floats or [0..255] for integers).

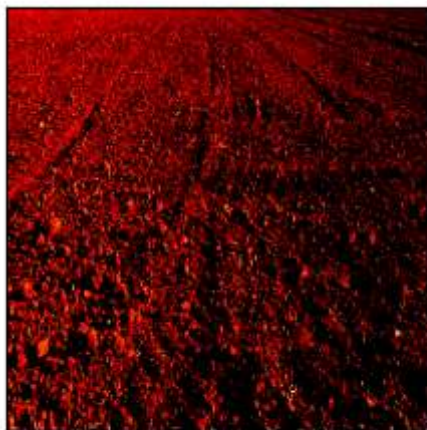

Laterite 100% (Laterite)

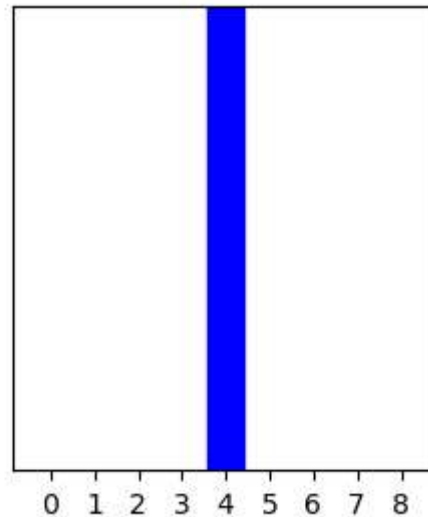

```
In [81]: i=166
plt.figure(figsize=(6,3))
plt.subplot(1,2,1)
plot_image(i, predictions[i], test_labels, testX)
plt.subplot(1,2,2)
plot_value_array(i, predictions[i], test_labels)
plt.show()
```

Clipping input data to the valid range for imshow with RGB data ([0..1] for floats or [0..255] for integers).

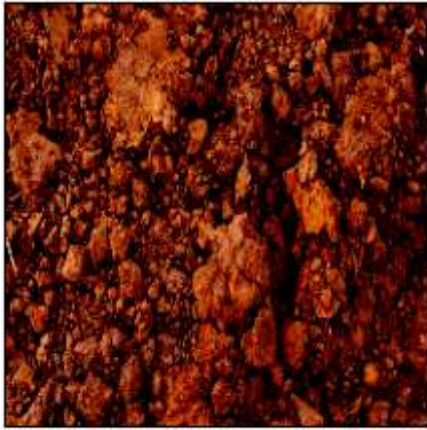

Laterite 100% (Laterite)

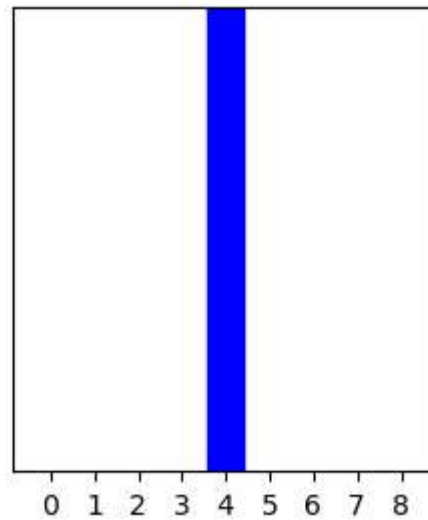

```
In [82]: i=200
plt.figure(figsize=(6,3))
plt.subplot(1,2,1)
plot_image(i, predictions[i], test_labels, testX)
plt.subplot(1,2,2)
plot_value_array(i, predictions[i], test_labels)
plt.show()
```

Clipping input data to the valid range for imshow with RGB data ([0..1] for floats or [0..255] for integers).

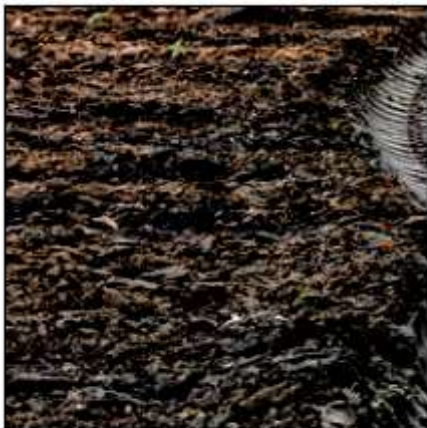

Peaty/Marshy 98% (Peaty/Marshy)

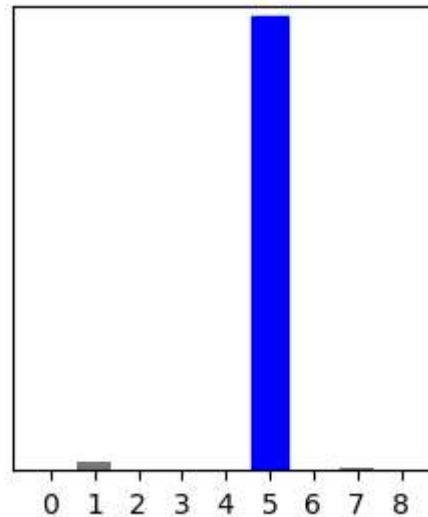

```
In [83]: i=45
plt.figure(figsize=(6,3))
plt.subplot(1,2,1)
plot_image(i, predictions[i], test_labels, testX)
plt.subplot(1,2,2)
plot_value_array(i, predictions[i], test_labels)
plt.show()
```

Clipping input data to the valid range for imshow with RGB data ([0..1] for floats or [0..255] for integers).

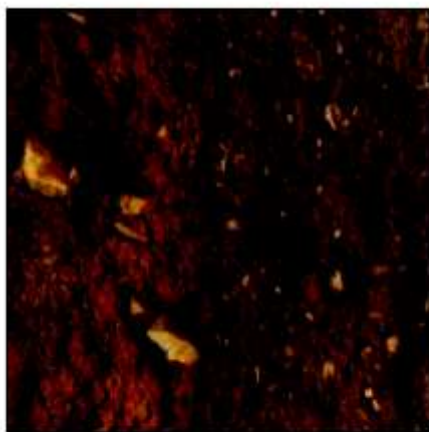

Alluvial 100% (Alluvial)

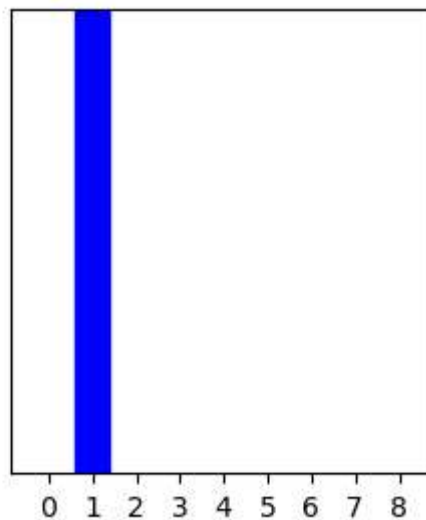

```
In [85]: i=334
plt.figure(figsize=(6,3))
plt.subplot(1,2,1)
plot_image(i, predictions[i], test_labels, testX)
plt.subplot(1,2,2)
plot_value_array(i, predictions[i], test_labels)
plt.show()
```

Clipping input data to the valid range for imshow with RGB data ([0..1] for floats or [0..255] for integers).

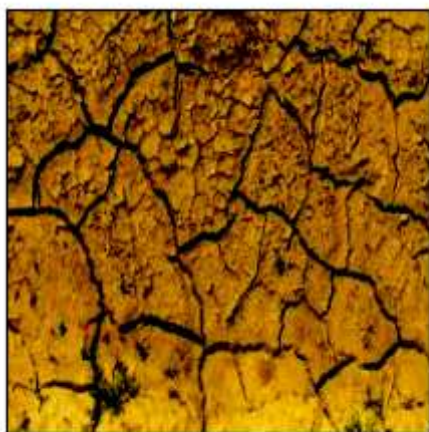

Arid 100% (Yellow)

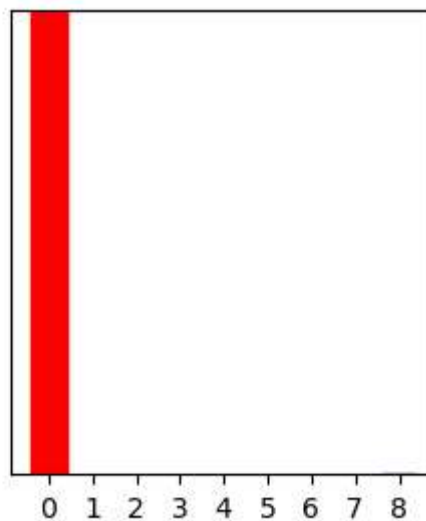

Supplement: s1 [file s1]
